# Supplementary material
Source: PubMed Central journal article supplement (PMC7020242)
Supplement: NIHMS1555427-supplement-SupplTables_S1-S3.pdf [file NIHMS1555427-supplement-SupplTables_S1-S3.pdf]

## Supplementary materials

to “What bacteria want” by Michael Y. Galperin, published in *Environmental Microbiology*,

<https://onlinelibrary.wiley.com/doi/abs/10.1111/1462-2920.14398>

**Table 1. Distribution of environmental sensors in selected bacteria (updated, with hyperlinks)**

| Organism, strain name                            | Genome size, kb | HK                 | MCP                | PTS EII C | cAMP               |     | c-di-GMP signaling |                   |                    |                   | c-di-AMP signaling |      |      | ECF sigma | Ser/Thr/Tyr~P      |                   |
|--------------------------------------------------|-----------------|--------------------|--------------------|-----------|--------------------|-----|--------------------|-------------------|--------------------|-------------------|--------------------|------|------|-----------|--------------------|-------------------|
|                                                  |                 |                    |                    |           | ACI, ACIII         | CPD | GGDEF              | GGDEF +EAL        | EAL                | HD-GYP            | DisA_N             | GbpP | PgpH |           | STYK               | PP2C              |
| <a href="#">Escherichia coli K-12</a>            | 4,639           | <a href="#">30</a> | <a href="#">5</a>  | 23        | <a href="#">1</a>  | 1   | <a href="#">12</a> | <a href="#">7</a> | <a href="#">10</a> | –                 | –                  | –    | –    | 2         | <a href="#">5</a>  | 3                 |
| <a href="#">Bacillus subtilis 168</a>            | 4,216           | <a href="#">36</a> | <a href="#">10</a> | 16        | –                  | –   | <a href="#">3</a>  | <a href="#">1</a> | <a href="#">2</a>  | –                 | 3                  | 1    | 1    | 7         | <a href="#">10</a> | <a href="#">7</a> |
| <a href="#">Mycobacterium tuberculosis H37Rv</a> | 4,412           | <a href="#">14</a> | –                  | –         | <a href="#">16</a> | 1   | –                  | <a href="#">1</a> | <a href="#">1</a>  | –                 | 1                  | 1    | –    | 10        | <a href="#">13</a> | <a href="#">2</a> |
| <a href="#">Porphyromonas gingivalis W83</a>     | 2,343           | <a href="#">6</a>  | –                  | –         | –                  | –   | –                  | –                 | –                  | –                 | 1                  | 1    | 1    | 6         | 1                  | 1                 |
| <a href="#">Neisseria gonorrhoeae FA 1090</a>    | 2,154           | <a href="#">4</a>  | –                  | –         | –                  | –   | –                  | –                 | –                  | –                 | –                  | –    | –    | 1         | <a href="#">1</a>  | –                 |
| <a href="#">Streptococcus pyogenes M1 GAS</a>    | 1,852           | <a href="#">12</a> | –                  | 14        | –                  | –   | –                  | –                 | –                  | –                 | 1                  | 2    | –    | 2         | <a href="#">1</a>  | <a href="#">1</a> |
| <a href="#">Haemophilus influenzae Rd KW20</a>   | 1,830           | <a href="#">4</a>  | –                  | 1         | <a href="#">1</a>  | 1   | –                  | –                 | –                  | –                 | –                  | –    | –    | 2         | <a href="#">1</a>  | –                 |
| <a href="#">Helicobacter pylori 26695</a>        | 1,668           | <a href="#">4</a>  | <a href="#">4</a>  | –         | –                  | –   | –                  | –                 | –                  | –                 | –                  | –    | –    | –         | <a href="#">1</a>  | <a href="#">1</a> |
| <a href="#">Treponema pallidum str. Nichols</a>  | 1,138           | <a href="#">1</a>  | <a href="#">4</a>  | –         | <a href="#">1</a>  | –   | <a href="#">1</a>  | –                 | –                  | <a href="#">3</a> | 1                  | 1    | 1    | 1         | 1                  | <a href="#">3</a> |
| <a href="#">Rickettsia typhi str. Wilmington</a> | 1,111           | <a href="#">4</a>  | –                  | –         | –                  | –   | <a href="#">1</a>  | –                 | <a href="#">1</a>  | –                 | –                  | –    | –    | –         | <a href="#">1</a>  | –                 |
| <a href="#">Chlamydia trachomatis D/UW-3/Cx</a>  | 1,043           | <a href="#">1</a>  | –                  | –         | –                  | 1   | –                  | –                 | –                  | –                 | 1                  | –    | –    | –         | <a href="#">3</a>  | <a href="#">3</a> |
| <a href="#">Mycoplasma pneumoniae M129</a>       | 816             | –                  | –                  | 4         | –                  | –   | –                  | –                 | –                  | –                 | 1                  | 2    | –    | 1         | <a href="#">1</a>  | <a href="#">1</a> |

Please address corrections and comments to [galperin@ncbi.nlm.nih.gov](mailto:galperin@ncbi.nlm.nih.gov)

**Table S1. Sensor proteins of *Escherichia coli* K-12**

| No.                      | Gene               | UniProt entry          |                            | Sensed ligand, parameter, or the sensor domain                     | Regulated genes, processes                                                                                                 | PubMed reference <sup>a</sup>                                                    |
|--------------------------|--------------------|------------------------|----------------------------|--------------------------------------------------------------------|----------------------------------------------------------------------------------------------------------------------------|----------------------------------------------------------------------------------|
| <b>Histidine kinases</b> |                    |                        |                            |                                                                    |                                                                                                                            |                                                                                  |
| 1                        | <i>arcB</i>        | <a href="#">P0AEC3</a> | <a href="#">ARCB_ECOLI</a> | Redox status of the respiratory chain                              | Anerobic respiration                                                                                                       | <a href="#">27656164</a><br><a href="#">29945971</a>                             |
| 2                        | <i>atoS</i>        | <a href="#">Q06067</a> | <a href="#">ATOS_ECOLI</a> | Acetoacetate, spermidine                                           | <i>atoDAEB</i> , fatty acid degradation, polyhydroxybutyrate biosynthesis                                                  | <a href="#">19198978</a><br><a href="#">22083893</a>                             |
| 3                        | <i>baeS</i>        | <a href="#">P30847</a> | <a href="#">BAES_ECOLI</a> | Envelope stress, iron, tungstate                                   | <i>spy</i> , <i>mdtABCD</i> ; <i>acrD</i>                                                                                  | <a href="#">21515766</a>                                                         |
| 4                        | <i>barA</i>        | <a href="#">P0AEC5</a> | <a href="#">BARA_ECOLI</a> | Redox stress, O <sub>2</sub> , H <sub>2</sub> O <sub>2</sub>       | <i>csrA/csrB</i> ; carbon storage, metabolism                                                                              | <a href="#">14619967</a>                                                         |
| 5                        | <i>basS</i>        | <a href="#">P30844</a> | <a href="#">BASS_ECOLI</a> | Fe, Zn                                                             | <i>csgD</i> , <i>elbA</i> , <i>csrB</i> , <i>inaA</i> ; LPS, membrane transporters                                         | <a href="#">22442305</a>                                                         |
| 6                        | <i>btsS (yehU)</i> | <a href="#">P0AD14</a> | <a href="#">BTSS_ECOLI</a> | Pyruvate, serine                                                   | <i>yjiY</i> ; nutrient assimilation                                                                                        | <a href="#">28469239</a>                                                         |
| 7                        | <i>cheA</i>        | <a href="#">P07363</a> | <a href="#">CHEA_ECOLI</a> | Activated MCPs                                                     | Chemotaxis                                                                                                                 | <a href="#">22494339</a><br><a href="#">24163342</a>                             |
| 8                        | <i>cpxA</i>        | <a href="#">P0AE82</a> | <a href="#">CPXA_ECOLI</a> | Envelope stress                                                    | <i>cpxP</i> , <i>degP</i> , <i>dsbA</i> , <i>ppiA</i> , adhesion to surfaces                                               | <a href="#">12670966</a><br><a href="#">23335416</a>                             |
| 9                        | <i>creC (phoM)</i> | <a href="#">P08401</a> | <a href="#">CREC_ECOLI</a> | Phosphate (and Ca <sup>2+</sup> , Mg <sup>2+</sup> )               | <i>ackA</i> , <i>pta</i> , <i>malE</i> , <i>talA</i> ; carbon metabolism                                                   | <a href="#">11350954</a><br><a href="#">26497466</a>                             |
| 10                       | <i>cusS</i>        | <a href="#">P77485</a> | <a href="#">CUSS_ECOLI</a> | High levels of Cu <sup>+</sup> , Ag <sup>+</sup>                   | Export of Cu <sup>+</sup> , Ag <sup>+</sup>                                                                                | <a href="#">27583660</a>                                                         |
| 11                       | <i>dcuS</i>        | <a href="#">P0AEC8</a> | <a href="#">DCUS_ECOLI</a> | Fumarate, other C4-dicarboxylates                                  | <i>frdABCD</i> ; <i>nuoAN</i> ; <i>dcuBC</i> ; <i>sdhCDAB</i>                                                              | <a href="#">25135747</a><br><a href="#">29203472</a>                             |
| 12                       | <i>dpiB (citA)</i> | <a href="#">P77510</a> | <a href="#">DPIB_ECOLI</a> | Citrate                                                            | Citrate, SOS response                                                                                                      | <a href="#">11889485</a>                                                         |
| 13                       | <i>envZ</i>        | <a href="#">P0AEJ4</a> | <a href="#">ENVZ_ECOLI</a> | Osmotic shock                                                      | <i>ompF</i> , <i>ompC</i> ; osmoregulation                                                                                 | <a href="#">22543870</a><br><a href="#">24681325</a>                             |
| 14                       | <i>evgS</i>        | <a href="#">P30855</a> | <a href="#">EVGS_ECOLI</a> | Acid pH, Na <sup>+</sup> , K <sup>+</sup>                          | Acid resistance, multidrug efflux pumps                                                                                    | <a href="#">24957621</a><br><a href="#">28674068</a>                             |
| 15                       | <i>glnL (ntrB)</i> | <a href="#">P0AFB5</a> | <a href="#">NTRB_ECOLI</a> | Nitrogen limitation                                                | <i>glnA</i> , <i>glnB</i>                                                                                                  | <a href="#">7961767</a>                                                          |
| 16                       | <i>glrK (yfhK)</i> | <a href="#">P52101</a> | <a href="#">GLRK_ECOLI</a> | Epinephrine, sulfate?                                              | <i>glmY</i> sRNA                                                                                                           | <a href="#">19843219</a>                                                         |
| 17                       | <i>hprS (yedV)</i> | <a href="#">P76339</a> | <a href="#">HPRS_ECOLI</a> | H <sub>2</sub> O <sub>2</sub> , DNA damage                         | <i>cyoA</i> , <i>hiuH</i> , <i>cusC</i>                                                                                    | <a href="#">25568260</a><br><a href="#">27983483</a>                             |
| 18                       | <i>kdpD</i>        | <a href="#">P21865</a> | <a href="#">KDPD_ECOLI</a> | K <sup>+</sup> gradient                                            | <i>kdpABC</i> ; K <sup>+</sup> uptake                                                                                      | <a href="#">23651428</a><br><a href="#">26350129</a>                             |
| 19                       | <i>narQ</i>        | <a href="#">P27896</a> | <a href="#">NARQ_ECOLI</a> | Nitrate, nitrite                                                   | <i>narDHII</i> ; <i>fdnGHI</i> ; <i>frdABCD</i> ; nitrate, formate, fumarate reductases                                    | <a href="#">18375557</a><br><a href="#">19968795</a>                             |
| 20                       | <i>narX</i>        | <a href="#">P0AFA2</a> | <a href="#">NARX_ECOLI</a> | Nitrite, nitrate                                                   |                                                                                                                            |                                                                                  |
| 21                       | <i>phoQ</i>        | <a href="#">P23837</a> | <a href="#">PHOQ_ECOLI</a> | Low Mg <sup>2+</sup> levels                                        | <i>hemL</i> , <i>mgrB</i> , <i>mgtA</i> , <i>nagA</i> , <i>rstAB</i> , <i>slyB</i> , <i>vboR</i> ; Mg <sup>2+</sup> uptake | <a href="#">12218035</a><br><a href="#">19889087</a><br><a href="#">29183977</a> |
| 22                       | <i>phoR</i>        | <a href="#">P08400</a> | <a href="#">PHOR_ECOLI</a> | Phosphate limitation (and/or Ca <sup>2+</sup> , Mg <sup>2+</sup> ) | Phosphate regulon                                                                                                          | <a href="#">12533489</a><br><a href="#">24563032</a>                             |

<sup>a</sup> – Here and below, the references are not exhaustive and are provided only as pointers to the functions of the respective proteins. Many additional references can be found on the UniProt web site

|                                           |                              |                                                    |                                                              |                                          |                                                        |                                                                                  |
|-------------------------------------------|------------------------------|----------------------------------------------------|--------------------------------------------------------------|------------------------------------------|--------------------------------------------------------|----------------------------------------------------------------------------------|
| 23                                        | <i>qseC</i>                  | <a href="#">P40719</a>                             | <a href="#">QSEC_ECOLI</a>                                   | Quorum sensing                           | <i>flhDC</i> ; flagella                                | <a href="#">16803956</a><br><a href="#">21542868</a>                             |
| 24<br>25                                  | <i>rscC</i> ,<br><i>rscD</i> | <a href="#">PODMC5</a><br><a href="#">P39838</a>   | <a href="#">RCSC_ECOLI</a><br><a href="#">RCSD_ECOLI</a>     | Envelope stress (via RcsF)               | Capsule biosynthesis, biofilm formation, cell division | <a href="#">13129944</a><br><a href="#">14651646</a><br><a href="#">28691662</a> |
| 26                                        | <i>rstB</i>                  | <a href="#">P18392</a>                             | <a href="#">RSTB_ECOLI</a>                                   | General stress?                          | No data                                                | <a href="#">25461694</a><br><a href="#">30011323</a>                             |
| 27                                        | <i>torS</i>                  | <a href="#">P39453</a>                             | <a href="#">TORS_ECOLI</a>                                   | Trimethylamine oxide                     | Anaerobic respiration                                  | <a href="#">25825431</a>                                                         |
| 28                                        | <i>uhpB</i>                  | <a href="#">P09835</a>                             | <a href="#">UHPB_ECOLI</a>                                   | Glucose-6-phosphate bound to UhpC        | Hexose phosphate transport                             | <a href="#">8349544</a><br><a href="#">12107138</a>                              |
| 29                                        | <i>ypdA</i>                  | <a href="#">P0AA93</a>                             | <a href="#">YPDA_ECOLI</a>                                   | Pyruvate                                 | <i>yhjX</i>                                            | <a href="#">23222720</a><br><a href="#">29038258</a>                             |
| 30                                        | <i>zraS</i>                  | <a href="#">P14377</a>                             | <a href="#">ZRAS_ECOLI</a>                                   | High Zn <sup>2+</sup> , Pb <sup>2+</sup> | Export of Zn <sup>2+</sup> , Pb <sup>2+</sup>          | <a href="#">26438879</a>                                                         |
| <b>Chemotaxis sensors (MCPs)</b>          |                              |                                                    |                                                              |                                          |                                                        |                                                                                  |
| 1                                         | <i>aer</i>                   | <a href="#">P50466</a>                             | <a href="#">AER_ECOLI</a>                                    | Redox state of respiratory chain         | Aerotaxis                                              | <a href="#">17824925</a><br><a href="#">27803157</a>                             |
| 2                                         | <i>tsr</i>                   | <a href="#">P02942</a>                             | <a href="#">MCP1_ECOLI</a>                                   | Serine                                   | Chemotaxis                                             | <a href="#">24205875</a>                                                         |
| 3                                         | <i>tar</i>                   | <a href="#">P07017</a>                             | <a href="#">MCP2_ECOLI</a>                                   | Asp, maltose                             | Chemotaxis                                             | <a href="#">27292793</a>                                                         |
| 4                                         | <i>trg</i>                   | <a href="#">P05704</a>                             | <a href="#">MCP3_ECOLI</a>                                   | Ribose, galactose                        | Chemotaxis                                             | <a href="#">11133962</a>                                                         |
| 5                                         | <i>tap</i>                   | <a href="#">P07018</a>                             | <a href="#">MCP4_ECOLI</a>                                   | Dipeptides, pyrimidine                   | Chemotaxis                                             | <a href="#">18065551</a>                                                         |
| <b>Sugar PTS membrane components EIIC</b> |                              |                                                    |                                                              |                                          |                                                        |                                                                                  |
| 1                                         | <i>ascF</i>                  | <a href="#">P24241</a>                             | <a href="#">PTIBC_ECOLI</a>                                  | Arbutin, cellobiose                      | Sugar uptake, chemotaxis                               | <a href="#">1630307</a>                                                          |
| 2,3                                       | <i>agaC</i> ,<br><i>agaW</i> | <a href="#">P42910</a> ,<br><a href="#">P42905</a> | <a href="#">PTPC1_ECOLI</a> ,<br><a href="#">PTPC2_ECOLI</a> | N-acetyl-galactosamine                   | Sugar uptake, chemotaxis                               | <a href="#">10931310</a>                                                         |
| 4                                         | <i>bglF</i>                  | <a href="#">P08722</a>                             | <a href="#">PTV3B_ECOLI</a>                                  | β-Glucosides                             | Sugar uptake, chemotaxis                               | <a href="#">12923168</a>                                                         |
| 5                                         | <i>chbC</i>                  | <a href="#">P17334</a>                             | <a href="#">PTQC_ECOLI</a>                                   | Diacetylchitobiose                       | Sugar uptake, chemotaxis                               | <a href="#">24593230</a>                                                         |
| 6                                         | <i>cmtA</i>                  | <a href="#">P69826</a>                             | <a href="#">PTMCB_ECOLI</a>                                  | Mannitol                                 | Sugar uptake, chemotaxis                               | <a href="#">8353127</a>                                                          |
| 7                                         | <i>fruA</i>                  | <a href="#">P20966</a>                             | <a href="#">PTFBC_ECOLI</a>                                  | Fructose                                 | Sugar uptake, chemotaxis                               | <a href="#">11361065</a>                                                         |
| 8                                         | <i>frvB</i>                  | <a href="#">P32154</a>                             | <a href="#">PTFLB_ECOLI</a>                                  | Fructose                                 | Sugar uptake, chemotaxis                               | <a href="#">11361065</a>                                                         |
| 9                                         | <i>frwC</i>                  | <a href="#">P32672</a>                             | <a href="#">PTFC2_ECOLI</a>                                  | Fructose                                 | Sugar uptake, chemotaxis                               | <a href="#">11361065</a>                                                         |
| 10                                        | <i>fryG</i>                  | <a href="#">P77579</a>                             | <a href="#">PTFC1_ECOLI</a>                                  | Fructose?                                | Sugar uptake, chemotaxis                               |                                                                                  |
| 11                                        | <i>gatC</i>                  | <a href="#">P69831</a>                             | <a href="#">PTKC_ECOLI</a>                                   | Galactitol                               | Sugar uptake, chemotaxis                               | <a href="#">8955298</a>                                                          |
| 12                                        | <i>glvC</i>                  | <a href="#">P31452</a>                             | <a href="#">PTXC_ECOLI</a>                                   | α-Glucosides?                            | Sugar uptake, chemotaxis                               |                                                                                  |
| 13                                        | <i>malX</i>                  | <a href="#">P19642</a>                             | <a href="#">PTOCB_ECOLI</a>                                  | Maltose                                  | Sugar uptake, chemotaxis                               | <a href="#">1856179</a>                                                          |
| 14                                        | <i>manY</i>                  | <a href="#">P69801</a>                             | <a href="#">PTNC_ECOLI</a>                                   | Mannose                                  | Sugar uptake, chemotaxis                               | <a href="#">2951378</a>                                                          |
| 15                                        | <i>mngA</i>                  | <a href="#">P54745</a>                             | <a href="#">MNGA_ECOLI</a>                                   | Mannosylglycerate                        | Sugar uptake, chemotaxis                               | <a href="#">14645248</a>                                                         |
| 16                                        | <i>mtIA</i>                  | <a href="#">P00550</a>                             | <a href="#">PTM3C_ECOLI</a>                                  | Mannitol                                 | Sugar uptake, chemotaxis                               | <a href="#">2407724</a>                                                          |
| 17                                        | <i>murP (yfeV)</i>           | <a href="#">P77272</a>                             | <a href="#">PTYBC_ECOLI</a>                                  | N-acetylmuramic acid                     | Sugar uptake, chemotaxis                               | <a href="#">15060041</a>                                                         |
| 18                                        | <i>nagE</i>                  | <a href="#">P09323</a>                             | <a href="#">PTW3C_ECOLI</a>                                  | N-acetylglucosamine                      | Sugar uptake, chemotaxis                               | <a href="#">19617367</a>                                                         |
| 19                                        | <i>ptsG</i>                  | <a href="#">P69786</a>                             | <a href="#">PTGCB_ECOLI</a>                                  | Glucose                                  | Sugar uptake, chemotaxis                               | <a href="#">21996078</a>                                                         |
| 20                                        | <i>sgcC</i>                  | <a href="#">P39365</a>                             | <a href="#">SGCC_ECOLI</a>                                   | Galactitol?                              | Sugar uptake, chemotaxis                               |                                                                                  |
| 21                                        | <i>srlA</i>                  | <a href="#">P56579</a>                             | <a href="#">PTHC_ECOLI</a>                                   | Sorbitol, glucitol                       | Sugar uptake, chemotaxis                               | <a href="#">1100608</a>                                                          |
| 22                                        | <i>treB</i>                  | <a href="#">P36672</a>                             | <a href="#">PTTBC_ECOLI</a>                                  | Trehalose                                | Sugar uptake, chemotaxis                               | <a href="#">24586369</a>                                                         |
| 23                                        | <i>ulaA</i>                  | <a href="#">P39301</a>                             | <a href="#">ULAA_ECOLI</a>                                   | Ascorbate                                | Sugar uptake, chemotaxis                               | <a href="#">12644495</a>                                                         |
| <b>Adenylate cyclase</b>                  |                              |                                                    |                                                              |                                          |                                                        |                                                                                  |
| 1                                         | <i>cyaA</i>                  | <a href="#">P00936</a>                             | <a href="#">CYAA_ECOLI</a>                                   | PTS EIIA <sup>Glc</sup>                  | Transcription of cAMP-CRP-dependent operons            | <a href="#">11988530</a>                                                         |

| <b>cAMP phosphodiesterase</b>                    |                    |                        |                            |                                           |                                                      |                                                                                  |
|--------------------------------------------------|--------------------|------------------------|----------------------------|-------------------------------------------|------------------------------------------------------|----------------------------------------------------------------------------------|
| 1                                                | <i>cpdA</i>        | <a href="#">P0AEW4</a> | <a href="#">CPDA_ECOLI</a> | Uncharacterized C-terminal domain         | cAMP levels                                          | <a href="#">8810311</a>                                                          |
| <b>Diguanylate cyclases (GGDEF domains)</b>      |                    |                        |                            |                                           |                                                      |                                                                                  |
| 1                                                | <i>dgcC (adrA)</i> | <a href="#">P0AAP1</a> | <a href="#">DGCC_ECOLI</a> | Unknown, MASE2 sensor domain              | Cellulose biosynthesis                               | <a href="#">11260463</a>                                                         |
| 2                                                | <i>dgcE (yegE)</i> | <a href="#">P38097</a> | <a href="#">DGCE_ECOLI</a> | Aspartate? MASE1 sensor domain            | Curli fimbriae                                       | <a href="#">19332833</a><br><a href="#">23740576</a>                             |
| 3                                                | <i>dgcF (yneF)</i> | <a href="#">P76147</a> | <a href="#">DGCF_ECOLI</a> | Aspartate? MASE1 sensor domain            | Motility, biofilm formation                          | <a href="#">21181144</a><br><a href="#">23740576</a>                             |
| 4                                                | <i>dgcI (yliF)</i> | <a href="#">P75801</a> | <a href="#">DGCI_ECOLI</a> | Unknown, GAPES2 sensor domain             | No data, low expression                              | <a href="#">19332833</a><br><a href="#">26148715</a>                             |
| 5                                                | <i>dgcJ (yeaI)</i> | <a href="#">P76237</a> | <a href="#">DGJ_ECOLI</a>  | Unknown, GAPES1 sensor domain             | Motility                                             | <a href="#">18765794</a><br><a href="#">26148715</a>                             |
| 6                                                | <i>dgcM (ydaM)</i> | <a href="#">P77302</a> | <a href="#">DGCM_ECOLI</a> | Unknown, two PAS sensor domains           | Curli fimbriae, biofilm formation                    | <a href="#">17010156</a><br><a href="#">19332833</a>                             |
| 7                                                | <i>dgcN (yfiN)</i> | <a href="#">P46139</a> | <a href="#">DGCN_ECOLI</a> | Unknown, CHASE8 sensor domain             | Motility, biofilm formation                          | <a href="#">21181144</a><br><a href="#">26148715</a>                             |
| 8                                                | <i>dgcO (yddV)</i> | <a href="#">P0AA89</a> | <a href="#">DOSE_ECOLI</a> | Oxygen, CO, NO                            | Exopolysaccharide, biofilm                           | <a href="#">20576684</a>                                                         |
| 9                                                | <i>dgcP (yeaP)</i> | <a href="#">P76245</a> | <a href="#">DGCP_ECOLI</a> | cAMP? GAF sensor domain                   | Curli fimbriae                                       | <a href="#">19332833</a>                                                         |
| 10                                               | <i>dgcQ (yedQ)</i> | <a href="#">P76330</a> | <a href="#">DGCQ_ECOLI</a> | Unknown, CHASE7 sensor domain             | Motility, biofilm formation                          | <a href="#">21181144</a><br><a href="#">26148715</a>                             |
| 11                                               | <i>dgcT (ycdT)</i> | <a href="#">P75908</a> | <a href="#">DGCT_ECOLI</a> | Unknown, MASE4 sensor domain              | Motility                                             | <a href="#">18713317</a><br><a href="#">26148715</a>                             |
| 12                                               | <i>dgcZ (ydeH)</i> | <a href="#">P31129</a> | <a href="#">DGCZ_ECOLI</a> | Zn <sup>2+</sup> , surface sensing        | Motility, surface adhesion, biofilm formation        | <a href="#">23769666</a><br><a href="#">27402625</a>                             |
| <b>c-di-GMP phosphodiesterases (EAL domains)</b> |                    |                        |                            |                                           |                                                      |                                                                                  |
| 1                                                | <i>pdeA (yfeA)</i> | <a href="#">P23842</a> | <a href="#">PDEA_ECOLI</a> | Aspartate? MASE1 sensor domain            | Biofilm formation                                    | <a href="#">23047748</a><br><a href="#">23740576</a>                             |
| 2                                                | <i>pdeB (ylaB)</i> | <a href="#">P77473</a> | <a href="#">PDEB_ECOLI</a> | Redox status in the periplasm, CSS domain | Poly-GlcNAc production                               | <a href="#">26553851</a><br><a href="#">29018125</a><br><a href="#">29514851</a> |
| 3                                                | <i>pdeC (yjcC)</i> | <a href="#">P32701</a> | <a href="#">PDEC_ECOLI</a> | Redox status in the periplasm, CSS domain | Poly-GlcNAc production                               | <a href="#">26553851</a><br><a href="#">29514851</a>                             |
| 4                                                | <i>pdeD (yodD)</i> | <a href="#">P76261</a> | <a href="#">PDED_ECOLI</a> | Redox status in the periplasm, CSS domain | Biofilm formation                                    | <a href="#">23047748</a><br><a href="#">29514851</a>                             |
| 5                                                | <i>pdeF (yfgF)</i> | <a href="#">P77172</a> | <a href="#">PDEF_ECOLI</a> | Aspartate? MASE1 sensor domain            | Biofilm formation (low-level expression)             | <a href="#">23047748</a><br><a href="#">23740576</a>                             |
| 6                                                | <i>pdeG (ycgG)</i> | <a href="#">P75995</a> | <a href="#">PDEG_ECOLI</a> | Redox status in the periplasm, CSS domain | Biofilm formation (low-level expression)             | <a href="#">20385176</a><br><a href="#">29514851</a>                             |
| 7                                                | <i>pdeH (yhjH)</i> | <a href="#">P37646</a> | <a href="#">PDEH_ECOLI</a> | No sensor domain                          | Flagellar motility, curli (major c-di-GMP hydrolase) | <a href="#">19332833</a>                                                         |
| 8                                                | <i>pdeI (yliE)</i> | <a href="#">P75800</a> | <a href="#">PDEI_ECOLI</a> | t <sup>o</sup> ; CHASE9 sensor domain     | Biofilm formation                                    | <a href="#">26148715</a><br><a href="#">26553851</a>                             |

|                                                      |                    |                        |                            |                                            |                                                                             |                                                                                  |
|------------------------------------------------------|--------------------|------------------------|----------------------------|--------------------------------------------|-----------------------------------------------------------------------------|----------------------------------------------------------------------------------|
| 9                                                    | <i>pdeK (yhjK)</i> | <a href="#">P37649</a> | <a href="#">PDEK_ECOLI</a> | Unknown, GAPES3 sensor domain              | Cellulose biosynthesis, biofilm formation                                   | <a href="#">23047748</a><br><a href="#">26148715</a>                             |
| 10                                                   | <i>pdeL (yahA)</i> | <a href="#">P21514</a> | <a href="#">PDEL_ECOLI</a> | DNA? Contains DNA-binding LuxR HTH domain  | Transcriptional regulator, biofilm formation                                | <a href="#">17827157</a><br><a href="#">24451384</a><br><a href="#">26553851</a> |
| 11                                                   | <i>pdeN (rtn)</i>  | <a href="#">P76446</a> | <a href="#">PDEN_ECOLI</a> | Redox status in the periplasm, CSS domain  | Biofilm formation                                                           | <a href="#">23047748</a><br><a href="#">26553851</a><br><a href="#">29514851</a> |
| 12                                                   | <i>pdeO (dosP)</i> | <a href="#">P76129</a> | <a href="#">DOSP_ECOLI</a> | Oxygen, CO, NO                             | RNA turnover                                                                | <a href="#">21320509</a><br><a href="#">25586128</a>                             |
| 13                                                   | <i>pdeR (yciR)</i> | <a href="#">P77334</a> | <a href="#">PDER_ECOLI</a> | Unknown, PAS sensor domain                 | CsgD, MlrA; Curli fimbriae, biofilm formation                               | <a href="#">19332833</a><br><a href="#">23708798</a>                             |
| <b>Enzymatically inactive GGDEF and EAL domains</b>  |                    |                        |                            |                                            |                                                                             |                                                                                  |
| 1                                                    | <i>bluF (ycgF)</i> | <a href="#">P75990</a> | <a href="#">BLUF_ECOLI</a> | Blue light, BLUF sensor domain             | <i>rcs</i> genes; no phosphodiesterase activity                             | <a href="#">16107542</a><br><a href="#">22783906</a>                             |
| 2                                                    | <i>cdgl (yeal)</i> | <a href="#">P76236</a> | <a href="#">CDGI_ECOLI</a> | Unknown, MASE4 sensor domain               | Motility, biofilm formation (low expression)                                | <a href="#">21181144</a><br><a href="#">26148715</a>                             |
| 3                                                    | <i>csrD (yhdA)</i> | <a href="#">P13518</a> | <a href="#">CSRD_ECOLI</a> | Unknown, GAPES4 sensor domain              | Carbon storage and metabolism                                               | <a href="#">16980588</a><br><a href="#">27235416</a>                             |
| 4                                                    | <i>rfIP (ydiV)</i> | <a href="#">P76204</a> | <a href="#">YDIV_ECOLI</a> | No sensor domain                           | Flagellar biosynthesis, P fimbriae                                          | <a href="#">23002140</a><br><a href="#">28652301</a>                             |
| <b>Extracytoplasmic function (ECF) sigma factors</b> |                    |                        |                            |                                            |                                                                             |                                                                                  |
| 1                                                    | <i>rpoE</i>        | <a href="#">P0AGB6</a> | <a href="#">RPOE_ECOLI</a> | Heat shock, envelope stress                | <i>dsbC, fkpA, skp, surA htrA, cutC, nlpB, purA, mdoG, mdoH, yggN, ytfJ</i> | <a href="#">18983936</a><br><a href="#">28924029</a><br><a href="#">29941590</a> |
| 2                                                    | <i>fecI</i>        | <a href="#">P23484</a> | <a href="#">FECL_ECOLI</a> | Ferric citrate via FecA, FecR              | <i>fecABCDE</i>                                                             | <a href="#">12618442</a><br><a href="#">12732308</a>                             |
| <b>Ser/Thr/Tyr protein kinases</b>                   |                    |                        |                            |                                            |                                                                             |                                                                                  |
| 1                                                    | <i>ubiB</i>        | <a href="#">P0A6A0</a> | <a href="#">UBIB_ECOLI</a> | No sensor domain                           | Ubiquinone biosynthesis enzymes UbiG, UbiE                                  | <a href="#">10960098</a><br><a href="#">25498144</a>                             |
| 2                                                    | <i>hipA</i>        | <a href="#">P23874</a> | <a href="#">HIPA_ECOLI</a> | PF13657 domain (uncharacterized)           | GltX; amino acid starvation, stringent response                             | <a href="#">17041039</a><br><a href="#">25848049</a>                             |
| 3                                                    | <i>rdoA (yihE)</i> | <a href="#">P0C0K3</a> | <a href="#">SRKA_ECOLI</a> | ROS, no sensor domain                      | Programmed cell death                                                       | <a href="#">17302814</a><br><a href="#">23416055</a>                             |
| 4                                                    | <i>yeaG</i>        | <a href="#">P0ACY3</a> | <a href="#">YEAG_ECOLI</a> | N-terminal AAA domain; nitrogen starvation | Methionine biosynthesis                                                     | <a href="#">29957170</a><br><a href="#">26621053</a>                             |
| 5                                                    | <i>yegI</i>        | <a href="#">P76393</a> | <a href="#">YEGI_ECOLI</a> | Unknown, contains DNA-binding HTH domain   | Persistence?                                                                | <a href="#">25911659</a><br><a href="#">29967116</a>                             |
| <b>Ser/Thr/Tyr protein phosphatases</b>              |                    |                        |                            |                                            |                                                                             |                                                                                  |
| 1                                                    | <i>prpA</i>        | <a href="#">P55798</a> | <a href="#">PRP1_ECOLI</a> | Misfolded proteins                         | <i>htrA</i> ; heat shock response                                           | <a href="#">9130712</a>                                                          |
| 2                                                    | <i>prpB</i>        | <a href="#">P55799</a> | <a href="#">PRP2_ECOLI</a> | Misfolded proteins                         | <i>htrA</i> ; heat shock response                                           | <a href="#">9130712</a>                                                          |
| 3                                                    | <i>yegK</i>        | <a href="#">P76395</a> | <a href="#">YEGK_ECOLI</a> | Unknown short C-terminal domain            | No data                                                                     | <a href="#">29967116</a>                                                         |

**Table S2. Sensor proteins of *Bacillus subtilis* strain 168<sup>a</sup>**

| No.                      | Gene        | UniProt entry          | Sensed signal and/or the sensor domain | Regulated genes, processes                          | PubMed reference <sup>b</sup>                                                                                                                                                           |
|--------------------------|-------------|------------------------|----------------------------------------|-----------------------------------------------------|-----------------------------------------------------------------------------------------------------------------------------------------------------------------------------------------|
| <b>Histidine kinases</b> |             |                        |                                        |                                                     |                                                                                                                                                                                         |
| 1                        | <i>bceS</i> | <a href="#">Q35044</a> | <a href="#">BCES_BACSU</a>             | Bacitracin, nisin                                   | Bacitracin resistance<br><a href="#">25118291</a><br><a href="#">27997719</a>                                                                                                           |
| 2                        | <i>cheA</i> | <a href="#">P29072</a> | <a href="#">CHEA_BACSU</a>             | Activated MCPs                                      | Chemotaxis<br><a href="#">21515776</a>                                                                                                                                                  |
| 3                        | <i>citS</i> | <a href="#">Q34427</a> | <a href="#">CITS_BACSU</a>             | Citrate                                             | <i>citM</i> ; citrate utilization<br><a href="#">10972810</a>                                                                                                                           |
| 4                        | <i>comP</i> | <a href="#">Q99027</a> | <a href="#">COMP_BACSU</a>             | Quorum sensing                                      | Competence<br><a href="#">16091051</a>                                                                                                                                                  |
| 5                        | <i>cssS</i> | <a href="#">Q32193</a> | <a href="#">CSSS_BACSU</a>             | Misfolded proteins                                  | <i>htrA</i> , <i>htrB</i> ; protein secretion<br><a href="#">22307758</a>                                                                                                               |
| 6                        | <i>dctS</i> | <a href="#">P96601</a> | <a href="#">DCTS_BACSU</a>             | C4-dicarboxylates                                   | <i>dctA</i> , <i>dctB</i> ; transport of dicarboxylic acids<br><a href="#">24375102</a>                                                                                                 |
| 7                        | <i>degS</i> | <a href="#">P13799</a> | <a href="#">DEGS_BACSU</a>             | Mechanosensing through flagellar rotation           | Competence, flagella formation; proteases<br><a href="#">23888912</a><br><a href="#">24317403</a>                                                                                       |
| 8                        | <i>desK</i> | <a href="#">Q34757</a> | <a href="#">DESK_BACSU</a>             | t <sup>o</sup> , membrane fluidity                  | Δ5 acyl-lipid desaturase<br><a href="#">27528507</a>                                                                                                                                    |
| 9                        | <i>glnK</i> | <a href="#">P40758</a> | <a href="#">GLNK_BACSU</a>             | Glutamine                                           | <i>glsA-glnT</i> operon, nitrogen metabolism<br><a href="#">17001076</a><br><a href="#">25691471</a>                                                                                    |
| 10                       | <i>kinA</i> | <a href="#">P16497</a> | <a href="#">KINA_BACSU</a>             | Starvation? 3 N-terminal PAS sensor domains         | <i>spo0A</i> , <i>spo0F</i> ; sporulation<br><a href="#">19561131</a><br><a href="#">23504013</a>                                                                                       |
| 11                       | <i>kinB</i> | <a href="#">Q08430</a> | <a href="#">KINB_BACSU</a>             | Starvation? ATP, GTP levels                         | <i>spo0A</i> , <i>spo0F</i> ; sporulation<br><a href="#">29314743</a>                                                                                                                   |
| 12                       | <i>kinC</i> | <a href="#">P39764</a> | <a href="#">KINC_BACSU</a>             | Membrane potential, flotilin; PAS sensor domain     | <i>spo0A</i> ; sporulation, biofilm formation<br><a href="#">20971918</a><br><a href="#">26297017</a>                                                                                   |
| 13                       | <i>kinD</i> | <a href="#">Q31671</a> | <a href="#">KIND_BACSU</a>             | Glycerol, Mg <sup>2+</sup> ; dCache_1 sensor domain | <i>spo0F</i> , <i>spo0A</i> ; sporulation, biofilm formation<br><a href="#">23436677</a><br><a href="#">23564171</a>                                                                    |
| 14                       | <i>kinE</i> | <a href="#">Q31661</a> | <a href="#">KINE_BACSU</a>             | Unknown; 4 PAS sensor domains                       | <i>spo0A</i> , <i>spo0F</i> ; sporulation, biofilm formation<br><a href="#">11069677</a>                                                                                                |
| 15                       | <i>liaS</i> | <a href="#">Q32198</a> | <a href="#">LIAS_BACSU</a>             | Cell wall stress, bacitracin                        | <i>liaIH</i> operon<br><a href="#">24666271</a>                                                                                                                                         |
| 16                       | <i>lytS</i> | <a href="#">P94513</a> | <a href="#">LYTS_BACSU</a>             | Pyruvate? 5TM-5TMR_LYT and GAF sensor domains       | <i>ysbA</i> ; cell wall metabolism, pyruvate consumption<br><a href="#">27422364</a>                                                                                                    |
| 17                       | <i>malk</i> | <a href="#">Q05250</a> | <a href="#">MALK_BACSU</a>             | Malate; sCache sensor domain                        | <i>maeA</i> , <i>maeN</i> , <i>yfIS</i><br><a href="#">12949160</a>                                                                                                                     |
| 18                       | <i>natK</i> | <a href="#">P70954</a> | <a href="#">NATK_BACSU</a>             | Unknown                                             | <i>natAB</i> ; sodium export<br><a href="#">17322186</a>                                                                                                                                |
| 19                       | <i>phoR</i> | <a href="#">P23545</a> | <a href="#">PHOR_BACSU</a>             | Phosphate limitation; sCache sensor domain          | Switch from cell wall teichoic acid to teichuronic acid<br><a href="#">25315493</a><br><a href="#">29644746</a>                                                                         |
| 20                       | <i>resE</i> | <a href="#">P35164</a> | <a href="#">RESE_BACSU</a>             | Anaerobiosis? PAS sensor domain                     | Aerobic and anaerobic respiration<br><a href="#">17189364</a><br><a href="#">22287527</a>                                                                                               |
| 21                       | <i>walk</i> | <a href="#">Q45614</a> | <a href="#">WALK_BACSU</a>             | Unknown; dCache_3 sensor domain                     | <i>ftsAZ</i> , <i>yocH</i> , <i>ykvT</i> , <i>cwIO</i> , <i>lytE</i> , <i>ydjM</i> , <i>yjeA</i> , <i>tagAB</i> , <i>tagDEF</i><br><a href="#">19019149</a><br><a href="#">29465029</a> |
| 22                       | <i>ybdK</i> | <a href="#">Q31433</a> | <a href="#">YBDK_BACSU</a>             | Unknown, 2TM domain                                 | No data<br><a href="#">20035725</a>                                                                                                                                                     |
| 23                       | <i>ycbM</i> | <a href="#">P42245</a> | <a href="#">YCBM_BACSU</a>             | Unknown                                             | No data                                                                                                                                                                                 |
| 24                       | <i>yckK</i> | <a href="#">P94414</a> | <a href="#">YCLK_BACSU</a>             | Unknown                                             | <i>yckIH</i> , <i>yckR</i> , <i>yckBC</i> , <i>yngABC</i> , <i>yycA</i><br><a href="#">20512483</a>                                                                                     |
| 25                       | <i>ydfH</i> | <a href="#">P96685</a> | <a href="#">YDFH_BACSU</a>             | Unknown; 6TM domain                                 | <i>ydfJ</i><br><a href="#">15941986</a>                                                                                                                                                 |

<sup>a</sup> – For more details and additional proteins, please see SubtiWiki, <http://www.subtiwiki.uni-goettingen.de/>.

<sup>b</sup> – Here and below, the references are not exhaustive and are provided only as pointers to the functions of the respective proteins. Additional references can be found at the UniProt and SubtiWiki web sites

|                                          |                                |                        |                             |                                                          |                                                                                              |                                                      |
|------------------------------------------|--------------------------------|------------------------|-----------------------------|----------------------------------------------------------|----------------------------------------------------------------------------------------------|------------------------------------------------------|
| 26                                       | <i>yesM</i>                    | <a href="#">O31516</a> | <a href="#">YESM_BACSU</a>  | Unknown, dCache_1 domain                                 | No data                                                                                      |                                                      |
| 27                                       | <i>InrJ</i><br>( <i>yfiJ</i> ) | <a href="#">P94438</a> | <a href="#">LNRJ_BACSU</a>  | Linearmycin?                                             | <i>InrLMN</i> ; Biofilm morphology                                                           | <a href="#">28461449</a>                             |
| 28                                       | <i>yhcY</i>                    | <a href="#">O07527</a> | <a href="#">YHCY_BACSU</a>  | Unknown, GAF domain                                      | No data                                                                                      | <a href="#">29785949</a>                             |
| 29                                       | <i>ykoH</i>                    | <a href="#">O34638</a> | <a href="#">YKOH_BACSU</a>  | Unknown                                                  | No data                                                                                      |                                                      |
| 30                                       | <i>yrkQ</i>                    | <a href="#">P54444</a> | <a href="#">YRKQ_BACSU</a>  | Unknown                                                  | <i>ykcBC, yrkON, yrkPQR</i>                                                                  | <a href="#">18175906</a>                             |
| 31                                       | <i>psdS</i><br>( <i>yvcQ</i> ) | <a href="#">O06979</a> | <a href="#">YVCQ_BACSU</a>  | Nisin, gallidermin, 2TM domain                           | <i>psdAB</i>                                                                                 | <a href="#">21078927</a><br><a href="#">27997719</a> |
| 32                                       | <i>yvfT</i>                    | <a href="#">Q795K2</a> | <a href="#">YVFT_BACSU</a>  | Unknown, 5TM domain                                      | No data                                                                                      |                                                      |
| 33                                       | <i>yvrG</i>                    | <a href="#">O34989</a> | <a href="#">YVRG_BACSU</a>  | Unknown                                                  | <i>dltABCDE, lytABC, sigO-rsoA, sigX-rsiX, wprA, wapA, sunAT-bdbA-yolJ-bdbB</i> , and others | <a href="#">16306698</a>                             |
| 34                                       | <i>ywpD</i>                    | <a href="#">P94586</a> | <a href="#">YWPD_BACSU</a>  | Unknown, truncated?                                      | No data                                                                                      |                                                      |
| 35                                       | <i>yxdK</i>                    | <a href="#">P42422</a> | <a href="#">YXDK_BACSU</a>  | Cationic antimicrobial peptide LL-37, 2TM domain         | <i>yxdLM-yxeA</i> ; ABC-type transporter                                                     | <a href="#">15289557</a><br><a href="#">15870467</a> |
| 36                                       | <i>yxjM</i>                    | <a href="#">P55183</a> | <a href="#">YXJM_BACSU</a>  | Unknown, 6TM domain                                      | No data                                                                                      |                                                      |
| <b>Chemotaxis sensors (MCPs)</b>         |                                |                        |                             |                                                          |                                                                                              |                                                      |
| 1                                        | <i>hemAT</i>                   | <a href="#">O07621</a> | <a href="#">HEMAT_BACSU</a> | Oxygen                                                   | Aerotaxis                                                                                    | <a href="#">12962628</a>                             |
| 2                                        | <i>mcpA</i>                    | <a href="#">P39214</a> | <a href="#">MCPA_BACSU</a>  | Glucose, $\alpha$ MeGlc; dCache_1 sensor domain          | Chemotaxis                                                                                   | <a href="#">8188684</a>                              |
| 3                                        | <i>mcpB</i>                    | <a href="#">P39215</a> | <a href="#">MCPB_BACSU</a>  | Asp/Asn, Glu, His; dCache_1 sensor domain                | Chemotaxis                                                                                   | <a href="#">19864420</a>                             |
| 4                                        | <i>mcpC</i>                    | <a href="#">P54576</a> | <a href="#">MCPC_BACSU</a>  | PTS sugars, amino acids, dCache_1 sensor domain          | Chemotaxis                                                                                   | <a href="#">23038252</a>                             |
| 5                                        | <i>tlpA</i>                    | <a href="#">P39216</a> | <a href="#">TLPA_BACSU</a>  | Unknown; dCache_1 sensor domain                          | Chemotaxis?                                                                                  |                                                      |
| 6                                        | <i>tlpB</i>                    | <a href="#">P39217</a> | <a href="#">TLPB_BACSU</a>  | Unknown; dCache_1 sensor domain                          | Chemotaxis?                                                                                  |                                                      |
| 7                                        | <i>tlpC</i>                    | <a href="#">P39209</a> | <a href="#">TLPC_BACSU</a>  | <i>Arabidopsis</i> root exudates, sCache_3 sensor domain | Chemotaxis                                                                                   | <a href="#">27899502</a>                             |
| 8                                        | <i>yfmS</i>                    | <a href="#">O06477</a> | <a href="#">YFMS_BACSU</a>  | Unknown, CHASE3 sensor domain                            | Chemotaxis?                                                                                  |                                                      |
| 9                                        | <i>yoaH</i>                    | <a href="#">O34576</a> | <a href="#">YOA_H_BACSU</a> | Unknown, CHASE3 sensor domain                            | Chemotaxis?                                                                                  |                                                      |
| 10                                       | <i>yvaQ</i>                    | <a href="#">O32239</a> | <a href="#">YVAQ_BACSU</a>  | Unknown, 4HB_MCP_1 sensor domain                         | Chemotaxis?                                                                                  |                                                      |
| <b>Sugar PTS membrane component EIIC</b> |                                |                        |                             |                                                          |                                                                                              | <a href="#">30038046</a>                             |
| 1                                        | <i>bglP</i>                    | <a href="#">P40739</a> | <a href="#">PTV3B_BACSU</a> | $\beta$ -Glucosides                                      | LicT; $\beta$ -glucoside metabolism                                                          | <a href="#">12169607</a><br><a href="#">23475962</a> |
| 2                                        | <i>fruA</i>                    | <a href="#">P71012</a> | <a href="#">PTF3A_BACSU</a> | Fructose                                                 | Chemotaxis, sugar utilization                                                                | <a href="#">20487301</a>                             |
| 3                                        | <i>gamP</i>                    | <a href="#">P39816</a> | <a href="#">PTW3C_BACSU</a> | Glucosamine                                              | Chemotaxis, sugar utilization                                                                | <a href="#">23667565</a>                             |
| 4                                        | <i>gmuC</i>                    | <a href="#">O05507</a> | <a href="#">PTEC_BACSU</a>  | Cellobiose, mannobiose                                   | Chemotaxis, sugar utilization                                                                | <a href="#">18177310</a>                             |
| 5                                        | <i>levF</i>                    | <a href="#">P26381</a> | <a href="#">PTFC_BACSU</a>  | Fructose                                                 | Chemotaxis, sugar utilization                                                                | <a href="#">9033408</a>                              |
| 6                                        | <i>licC</i><br>( <i>celB</i> ) | <a href="#">P46317</a> | <a href="#">PTJC_BACSU</a>  | Cellobiose, lichenan                                     | LicR; metabolism of oligo- $\beta$ -glucosides                                               | <a href="#">8990303</a><br><a href="#">10438772</a>  |
| 7                                        | <i>malP</i>                    | <a href="#">P54715</a> | <a href="#">PTOCB_BACSU</a> | Maltose                                                  | Chemotaxis, sugar utilization                                                                | <a href="#">16707683</a>                             |
| 8                                        | <i>manP</i>                    | <a href="#">O31645</a> | <a href="#">PTN3B_BACSU</a> | Mannose                                                  | ManR, mannose utilization                                                                    | <a href="#">23551403</a>                             |
| 9                                        | <i>mtlA</i>                    | <a href="#">P42956</a> | <a href="#">PTMCB_BACSU</a> | Mannitol                                                 | MtIR; mannitol utilization                                                                   | <a href="#">23279188</a>                             |
| 10                                       | <i>murP</i><br>( <i>ybbF</i> ) | <a href="#">Q797S1</a> | <a href="#">PTXBC_BACSU</a> | N-acetylmuramic acid                                     | Chemotaxis, sugar utilization                                                                | <a href="#">20400549</a><br><a href="#">23504016</a> |



|                                                              |                                |                        |                             |                                                                                                 |                                                                                                       |                                                                                                              |
|--------------------------------------------------------------|--------------------------------|------------------------|-----------------------------|-------------------------------------------------------------------------------------------------|-------------------------------------------------------------------------------------------------------|--------------------------------------------------------------------------------------------------------------|
| 11                                                           | <i>nagP</i>                    | <a href="#">O34521</a> | <a href="#">PTWCB_BACSU</a> | N-acetylglucosamine                                                                             | Chemotaxis, sugar utilization                                                                         | <a href="#">23667565</a>                                                                                     |
| 12                                                           | <i>ptsG</i>                    | <a href="#">P20166</a> | <a href="#">PTG3C_BACSU</a> | Glucose                                                                                         | GlcT; sugar utilization                                                                               | <a href="#">11902727</a><br><a href="#">22722928</a>                                                         |
| 13                                                           | <i>sacP</i>                    | <a href="#">P05306</a> | <a href="#">PTSBC_BACSU</a> | Sucrose                                                                                         | SacT; sugar utilization                                                                               | <a href="#">1577686</a><br><a href="#">21278164</a>                                                          |
| 14                                                           | <i>sacX</i>                    | <a href="#">P15400</a> | <a href="#">SACX_BACSU</a>  | Sucrose                                                                                         | SacY; sugar utilization                                                                               | <a href="#">9202047</a>                                                                                      |
| 15                                                           | <i>treP</i>                    | <a href="#">P39794</a> | <a href="#">PTTBC_BACSU</a> | Trehalose                                                                                       | Chemotaxis, sugar utilization                                                                         | <a href="#">18977770</a>                                                                                     |
| 16                                                           | <i>ywbA</i>                    | <a href="#">P39584</a> | <a href="#">YWBA_BACSU</a>  | Unknown                                                                                         | No data                                                                                               |                                                                                                              |
| <b>c-di-GMP synthases (GGDEF domains)</b>                    |                                |                        |                             |                                                                                                 |                                                                                                       |                                                                                                              |
| 1                                                            | <i>dgcK</i><br>( <i>yhck</i> ) | <a href="#">P54595</a> | <a href="#">YHCK_BACSU</a>  | Unknown, 5TM-5TMR_LYT sensor domain                                                             | Swarming motility                                                                                     | <a href="#">23893111</a><br><a href="#">27897378</a><br><a href="#">28536559</a>                             |
| 2                                                            | <i>dgcP</i><br>( <i>ytrP</i> ) | <a href="#">O34325</a> | <a href="#">YTRP_BACSU</a>  | Unknown, two GAF domains                                                                        | Swarming motility                                                                                     | <a href="#">23893111</a><br><a href="#">27897378</a><br><a href="#">28536559</a>                             |
| 3                                                            | <i>ydaK</i>                    | <a href="#">P96585</a> | <a href="#">YDAK_BACSU</a>  | Binds c-di-GMP but does not synthesize it                                                       | <i>ydaKLMN</i> ; extracellular matrix                                                                 | <a href="#">27897378</a><br><a href="#">28536559</a>                                                         |
| <b>c-di-GMP related enzymes (both GGDEF and EAL domains)</b> |                                |                        |                             |                                                                                                 |                                                                                                       |                                                                                                              |
| 1                                                            | <i>dgcW</i><br>( <i>ykoW</i> ) | <a href="#">O34311</a> | <a href="#">YKOW_BACSU</a>  | Nitric oxide? Contains MHYT sensor domain                                                       | Biofilm formation, dispersal                                                                          | <a href="#">11728710</a><br><a href="#">23893111</a>                                                         |
| <b>c-di-GMP phosphodiesterase (EAL domain)</b>               |                                |                        |                             |                                                                                                 |                                                                                                       |                                                                                                              |
| 1                                                            | <i>ykul</i>                    | <a href="#">O35014</a> | <a href="#">YKUI_BACSU</a>  | Binds c-di-GMP but does not hydrolyze it                                                        | No data                                                                                               | <a href="#">19244251</a>                                                                                     |
| 2                                                            | <i>pdeH</i><br>( <i>yuxH</i> ) | <a href="#">P14203</a> | <a href="#">YUXH_BACSU</a>  | Contains C-terminal HDOD domain (uncharacterized)                                               | Swarming motility, biofilm formation                                                                  | <a href="#">23893111</a><br><a href="#">22821967</a>                                                         |
| <b>c-di-AMP synthases</b>                                    |                                |                        |                             |                                                                                                 |                                                                                                       |                                                                                                              |
| 1                                                            | <i>disA</i>                    | <a href="#">P37573</a> | <a href="#">DISA_BACSU</a>  | DNA damage                                                                                      | Sporulation, DNA repair                                                                               | <a href="#">18439896</a><br><a href="#">21566650</a>                                                         |
| 2                                                            | <i>cdaA</i><br>( <i>ybbP</i> ) | <a href="#">Q45589</a> | <a href="#">CDAA_BACSU</a>  | Regulated by CdaR (YbbR), contains N-terminal 3TM domain                                        | Potassium homeostasis                                                                                 | <a href="#">23192352</a><br><a href="#">26240071</a><br><a href="#">28420751</a>                             |
| 3                                                            | <i>cdaS</i><br>( <i>yojJ</i> ) | <a href="#">O31854</a> | <a href="#">CDAS_BACSU</a>  | Unknown; contains autoinhibitory N-terminal domain                                              | Germination                                                                                           | <a href="#">24939848</a>                                                                                     |
| <b>c-di-AMP phosphodiesterases</b>                           |                                |                        |                             |                                                                                                 |                                                                                                       |                                                                                                              |
| 1                                                            | <i>gdpP</i>                    | <a href="#">P37484</a> | <a href="#">GDPP_BACSU</a>  | Oxygen, CO, NO; PAS-like domain                                                                 | Potassium homeostasis, cell growth                                                                    | <a href="#">26240071</a>                                                                                     |
| 2                                                            | <i>pgpH</i>                    | <a href="#">P46344</a> | <a href="#">PGPH_BACSU</a>  | Unknown; contains 7TM-HDED extracellular sensor domain and 7TM-7TMR_HD integral membrane domain | Potassium homeostasis, cell growth                                                                    | <a href="#">26240071</a>                                                                                     |
| <b>Ser/Thr/Tyr protein kinases</b>                           |                                |                        |                             |                                                                                                 |                                                                                                       |                                                                                                              |
| 1                                                            | <i>prkA</i>                    | <a href="#">P39134</a> | <a href="#">PRKA_BACSU</a>  | Unknown                                                                                         | Control of SigK, sporulation                                                                          | <a href="#">25983726</a>                                                                                     |
| 2                                                            | <i>prkC</i><br>( <i>yloP</i> ) | <a href="#">O34507</a> | <a href="#">PRKC_BACSU</a>  | Muropeptides; contains 3 PASTA sensor domains                                                   | AbrB, CpgA, EF-Tu, GlmR, GngF (YvcK), GpsB, YezB, PtkA, WalR, SpoIIAB; sporulation, biofilm formation | <a href="#">12399479</a><br><a href="#">19246764</a><br><a href="#">25278935</a><br><a href="#">25012659</a> |
| 3                                                            | <i>prkD</i><br>( <i>ybdM</i> ) | <a href="#">O31435</a> | <a href="#">YBDM_BACSU</a>  | Unknown, no sensor domain                                                                       | AbrB, DegS, HprK, RsbT, RsbW, SpoIIAB                                                                 | <a href="#">21304896</a><br><a href="#">25278935</a>                                                         |



|                                                      |                                |                        |                             |                                                                            |                                                                                                       |                                                                                  |
|------------------------------------------------------|--------------------------------|------------------------|-----------------------------|----------------------------------------------------------------------------|-------------------------------------------------------------------------------------------------------|----------------------------------------------------------------------------------|
| 4                                                    | <i>yabT</i>                    | <a href="#">P37562</a> | <a href="#">PKN1_BACSU</a>  | DNA; forespore-specific                                                    | AbrB, YabA, DegS, SpoIIAB, EF-Tu; sporulation                                                         | <a href="#">23634894</a><br><a href="#">25278935</a><br><a href="#">29619013</a> |
| 5                                                    | <i>hprK</i>                    | <a href="#">O34483</a> | <a href="#">HPRK_BACSU</a>  | Unknown; combines kinase and phosphorylase domain                          | Hpr, Crh, PrkD; carbohydrate metabolism                                                               | <a href="#">12359880</a><br><a href="#">12779331</a><br><a href="#">22001508</a> |
| 6                                                    | <i>ptkA</i><br>( <i>ywqD</i> ) | <a href="#">P96716</a> | <a href="#">YWQD_BACSU</a>  | Interaction with EpsA, TkmA (YwqC), Sala                                   | Ugd/YwqF, DnaK, TuaD, SsbA, SsbB, Eno, Ldh, InfA, OppA, YabT                                          | <a href="#">12970183</a><br><a href="#">20497499</a><br><a href="#">27725816</a> |
| 7                                                    | <i>epsB</i><br>( <i>ptkB</i> ) | <a href="#">P71051</a> | <a href="#">YVEL_BACSU</a>  | Interaction with TkmA (YwqC), TkmB                                         | Exopolysaccharide production                                                                          | <a href="#">24493247</a><br><a href="#">25085422</a><br><a href="#">25667587</a> |
| 8                                                    | <i>rsbT</i>                    | <a href="#">P42411</a> | <a href="#">RSBT_BACSU</a>  | Environmental stress                                                       | RsbR, RsbRB, RsbRC, RsbRD, RsbS; control of SigB                                                      | <a href="#">9786195</a><br><a href="#">21362065</a>                              |
| 9                                                    | <i>rsbW</i>                    | <a href="#">P17904</a> | <a href="#">RSBU_BACSU</a>  | Energy stress, ATP/ADP ratio?                                              | RsbV; control of SigB                                                                                 | <a href="#">8144446</a><br><a href="#">12270815</a>                              |
| 10                                                   | <i>spoIIAB</i>                 | <a href="#">P10728</a> | <a href="#">SP2AB_BACSU</a> | ATP/ADP ratio?                                                             | SpoIIAA; control of SigF                                                                              | <a href="#">8358793</a>                                                          |
| 11                                                   | <i>yrzF</i>                    | <a href="#">O32057</a> | <a href="#">YRZF_BACSU</a>  | Unknown                                                                    | No data                                                                                               |                                                                                  |
| –                                                    | <i>mcsB</i>                    | <a href="#">P37570</a> | <a href="#">MCSB_BACSU</a>  | Arg kinase, no Ser/Thr/Tyr kinase activity                                 | Stress response                                                                                       | <a href="#">27749819</a><br><a href="#">25610436</a>                             |
| <b>Ser/Thr/Tyr protein phosphatases</b>              |                                |                        |                             |                                                                            |                                                                                                       |                                                                                  |
| 1                                                    | <i>prpC</i>                    | <a href="#">O34779</a> | <a href="#">PRPC_BACSU</a>  | No sensor domain                                                           | PrkC, CpgA, EF-Tu, YezB; sporulation, biofilm formation                                               | <a href="#">12399479</a><br><a href="#">19246764</a>                             |
| 2                                                    | <i>ptpZ</i><br>( <i>ywqE</i> ) | <a href="#">P96717</a> | <a href="#">YWQE_BACSU</a>  | Unknown                                                                    | PtkA, Ugd/YwqF, SsbA, SsbB                                                                            | <a href="#">15866923</a><br><a href="#">16549871</a>                             |
| 3                                                    | <i>rsbP</i>                    | <a href="#">O07014</a> | <a href="#">RSBP_BACSU</a>  | Energy stress, red light; PAS sensor domain                                | RsbV, SigB                                                                                            | <a href="#">10632888</a><br><a href="#">19948797</a>                             |
| 4                                                    | <i>rsbU</i>                    | <a href="#">P40399</a> | <a href="#">RSBU_BACSU</a>  | Environmental stress; KaiA/RsbU (PF08673) domain                           | RsbV, SigB                                                                                            | <a href="#">10632888</a><br><a href="#">17303566</a>                             |
| 5                                                    | <i>rsbX</i>                    | <a href="#">P17906</a> | <a href="#">RSBX_BACSU</a>  | Environmental stress                                                       | RsbR, RsbS                                                                                            | <a href="#">15466036</a>                                                         |
| 6                                                    | <i>spoIIE</i>                  | <a href="#">P37475</a> | <a href="#">SP2E_BACSU</a>  | 10-TM N-terminal domain                                                    | SpoIIAA; sporulation                                                                                  | <a href="#">8830262</a><br><a href="#">22115775</a>                              |
| 7                                                    | <i>yfkI</i>                    | <a href="#">O35016</a> | <a href="#">YFKJ_BACSU</a>  | Unknown                                                                    | Stress response?                                                                                      | <a href="#">15995210</a>                                                         |
| –                                                    | <i>ywIE</i>                    | <a href="#">P39155</a> | <a href="#">PAP_BACSU</a>   | pArg phosphatase, no pTyr phosphatase activity                             | –                                                                                                     | <a href="#">15995210</a><br><a href="#">23770242</a>                             |
| –                                                    | <i>prpE</i><br>( <i>yjbP</i> ) | <a href="#">O31614</a> | <a href="#">PRPE_BACSU</a>  | Ap4A hydrolase, can dephosphorylate pTyr                                   | Spore germination?                                                                                    | <a href="#">12059787</a><br><a href="#">23824080</a>                             |
| <b>Extracytoplasmic function (ECF) sigma factors</b> |                                |                        |                             |                                                                            |                                                                                                       |                                                                                  |
| 1                                                    | <i>sigM</i>                    | <a href="#">O07582</a> | <a href="#">SIGM_BACSU</a>  | Cell wall-targeting antibiotics, ethanol, heat and acid stress, superoxide | <i>bcrC, yack, ydaH, yfni, yjbD, ypbG, ypuA, yraA, ysaA</i> ; integrity of the membrane and cell wall | <a href="#">17675383</a><br><a href="#">22211522</a>                             |
| 2                                                    | <i>sigV</i>                    | <a href="#">O05404</a> | <a href="#">SIGV_BACSU</a>  | Envelope stress, no sensor domain                                          | <i>asnB, bcrC, divIC, dltA, bbpX, ycgQ, ydjF, ypuA, ywaC</i> , lysozyme resistance                    | <a href="#">21926231</a><br><a href="#">23687273</a>                             |
| 3                                                    | <i>sigW</i>                    | <a href="#">Q45585</a> | <a href="#">SIGW_BACSU</a>  | Envelope and membrane stress, no sensor domain                             | <i>rsiW, spoOM, yeaA, ysdB, yjoB, ydjP</i> , etc; bacteriocin production                              | <a href="#">16899079</a><br><a href="#">23155385</a>                             |
| 4                                                    | <i>sigX</i>                    | <a href="#">P35165</a> | <a href="#">SIGX_BACSU</a>  | Heat shock, cationic antimicrobial peptides                                | Abh; septum and wall synthesis; biofilm formation                                                     | <a href="#">17675383</a>                                                         |
| 5                                                    | <i>sigY</i>                    | <a href="#">P94370</a> | <a href="#">SIGY_BACSU</a>  | Nitrogen starvation                                                        | <i>ybgB, yxlCDEFG</i> ; maintenance of the Spβ prophage                                               | <a href="#">12897008</a><br><a href="#">22400495</a>                             |
| 6                                                    | <i>sigZ</i>                    | <a href="#">O05409</a> | <a href="#">SIGZ_BACSU</a>  | Unknown                                                                    | No data                                                                                               |                                                                                  |
| 7                                                    | <i>ylaC</i>                    | <a href="#">O07627</a> | <a href="#">YLAC_BACSU</a>  | Redox changes, Mn <sup>2+</sup> levels                                     | <i>clpP, sigH</i> ; oxidative stress                                                                  | <a href="#">29760236</a>                                                         |

**Table S3. Environmental sensor proteins of some common bacterial pathogens**

| No                                            | Locus tag (gene)       | UniProt entry          | Sensor type | Sensed ligand, sensor domain                         | Regulated genes, processes                                                     | PubMed reference                                     |
|-----------------------------------------------|------------------------|------------------------|-------------|------------------------------------------------------|--------------------------------------------------------------------------------|------------------------------------------------------|
| <b><i>Chlamydia trachomatis</i> D/UW-3/Cx</b> |                        |                        |             |                                                      |                                                                                |                                                      |
| 1                                             | CT_467 ( <i>ctcB</i> ) | <a href="#">O84473</a> | HK          | Unknown, PAS sensor domain                           | Cell development                                                               | <a href="#">12600998</a>                             |
| 1                                             | CT_754 ( <i>cpdA</i> ) | <a href="#">O84759</a> | CPD         | Metallophosphoesterase, no sensor domain             | No data                                                                        | <a href="#">3023286</a>                              |
| 1                                             | CT_145 ( <i>pkn1</i> ) | <a href="#">O84147</a> | STYK        | Unknown, C-type lectin (FGE-sulfatase) sensor domain | Phosphorylates inclusion membrane protein IncG                                 | <a href="#">14500499</a>                             |
| 2                                             | CT_301 ( <i>pknD</i> ) | <a href="#">O84303</a> | STYK        | Unknown, contains a TPR-like helical domain          | Phosphorylates the FHA domain in the T3SS protein CdsD (CT_664)                | <a href="#">14500499</a><br><a href="#">17766419</a> |
| 3                                             | CT_673 ( <i>pkn5</i> ) | <a href="#">O84680</a> | STYK        | Unknown, may be inactive                             | No data                                                                        |                                                      |
| 1                                             | CT_259 ( <i>cppA</i> ) | <a href="#">O84592</a> | PP2C        | No sensor domain                                     | Unknown, protein phosphatase activity shown <i>in vitro</i> and <i>in vivo</i> | <a href="#">27114464</a><br><a href="#">30038048</a> |
| 2                                             | CT_588 ( <i>rsbU</i> ) | <a href="#">O84592</a> | PPM         | Unknown, uncharacterized Chlamydia-specific domain   | Regulation of sigma subunit                                                    | <a href="#">16390455</a><br><a href="#">26313645</a> |
| 3                                             | CT_589                 | <a href="#">O84593</a> | PPM         | Unknown, uncharacterized Chlamydia-specific domain   | Competence, synthesis of proteases, flagella                                   |                                                      |

|                                              |                        |                        |      |                                                                    |                                                                                         |                                                                                |
|----------------------------------------------|------------------------|------------------------|------|--------------------------------------------------------------------|-----------------------------------------------------------------------------------------|--------------------------------------------------------------------------------|
| <b><i>Haemophilus influenzae</i> Rd KW20</b> |                        |                        |      |                                                                    |                                                                                         |                                                                                |
| 1                                            | HI0220 ( <i>arcB</i> ) | <a href="#">Q9L746</a> | HK   | Redox status of the respiratory chain                              | Aerobic respiration                                                                     | <a href="#">11717280</a>                                                       |
| 2                                            | HI0267 ( <i>narQ</i> ) | <a href="#">P44604</a> | HK   | Nitrate/nitrite                                                    | <i>narDHIJ</i> ; <i>fdnGHI</i> ; <i>frdABCD</i> ; nitrate, formate, fumarate reductases | <a href="#">16199562</a>                                                       |
| 3                                            | HI1378 ( <i>phoR</i> ) | <a href="#">P71380</a> | HK   | Phosphate limitation (and/or Ca <sup>2+</sup> , Mg <sup>2+</sup> ) | Phosphate regulon                                                                       | <a href="#">8892843</a>                                                        |
| 4                                            | HI1707 ( <i>basS</i> ) | <a href="#">P45336</a> | HK   | Quorum sensing                                                     | <i>flhDC</i> ; flagella                                                                 | <a href="#">8892843</a>                                                        |
| 1                                            | HI0446 ( <i>fruA</i> ) | <a href="#">P44714</a> | EIIC | Fructose                                                           | Competence, fermentation of ribose and galactose                                        | <a href="#">8885265</a><br><a href="#">8763608</a><br><a href="#">12949188</a> |
| 1                                            | HI0604 ( <i>cyaA</i> ) | <a href="#">P40134</a> | ACI  | PTS component EIIA <sup>Glc</sup>                                  | Various cAMP-CRP-dependent operons                                                      | <a href="#">8226661</a> ;<br><a href="#">8892843</a>                           |
| 1                                            | HI0399 ( <i>cpdA</i> ) | <a href="#">P44685</a> | CPD  | Uncharacterized C-terminal domain                                  | cAMP levels, competence                                                                 | <a href="#">9721275</a>                                                        |
| 1                                            | HI0628 ( <i>rpoE</i> ) | <a href="#">P44790</a> | ECF  | Heat shock, envelope stress                                        | No data                                                                                 | <a href="#">11796603</a>                                                       |
| 2                                            | HI1459                 | <a href="#">P45215</a> | ECF  | No sensor domain                                                   | Virulence, host survival                                                                | <a href="#">12473436</a>                                                       |
| 1                                            | HI1326                 | <a href="#">P44162</a> | STYK | Unknown                                                            | No data                                                                                 |                                                                                |

| No                                      | Locus tag (gene)        | UniProt entry          | Sensor type | Sensed ligand, sensor domain                                          | Regulated genes, processes    | PubMed reference                                                                                             |
|-----------------------------------------|-------------------------|------------------------|-------------|-----------------------------------------------------------------------|-------------------------------|--------------------------------------------------------------------------------------------------------------|
| <b><i>Helicobacter pylori</i> 26695</b> |                         |                        |             |                                                                       |                               |                                                                                                              |
| 1                                       | HP_0164 ( <i>arsS</i> ) | <a href="#">Q24971</a> | HK          | pH? No sensor domain                                                  | Acid resistance               | <a href="#">17609149</a><br><a href="#">22865848</a>                                                         |
| 2                                       | HP_0244 ( <i>flgS</i> ) | <a href="#">Q25026</a> | HK          | Unknown sensor domain                                                 | Flagellar motility            | <a href="#">25802298</a>                                                                                     |
| 3                                       | HP_0392 ( <i>cheA</i> ) | <a href="#">Q25153</a> | HK          | CheA, interacts with MCPs                                             | Chemotaxis                    | <a href="#">10722597</a><br><a href="#">15664919</a><br><a href="#">28242706</a>                             |
| 4                                       | HP_1364 ( <i>crdS</i> ) | <a href="#">Q25917</a> | HK          | Unknown sensor domain                                                 | Cu <sup>2+</sup> resistance   | <a href="#">15968080</a>                                                                                     |
| 1                                       | HP_0082 ( <i>tlpC</i> ) | <a href="#">Q24911</a> | MCP         | Lactate, other acids                                                  | Chemotaxis                    | <a href="#">12228322</a><br><a href="#">29075010</a>                                                         |
| 2                                       | HP_0099 ( <i>tlpA</i> ) | <a href="#">Q24925</a> | MCP         | Arginine, bicarbonate                                                 | Chemotaxis, virulence         | <a href="#">12892880</a><br><a href="#">12228322</a>                                                         |
| 3                                       | HP_0103 ( <i>tlpB</i> ) | <a href="#">Q24929</a> | MCP         | Urea, acidic pH, quorum-sensing autoinducer-2; sCache_2 sensor domain | pH taxis, colonization        | <a href="#">16547053</a><br><a href="#">22705207</a><br><a href="#">21602215</a><br><a href="#">26269952</a> |
| 4                                       | HP_0599 ( <i>tlpD</i> ) | <a href="#">Q25321</a> | MCP         | Zn <sup>2+</sup> , acid, reactive oxygen species; SZB sensor domain   | Chemotaxis, stomach infection | <a href="#">22802346</a><br><a href="#">23139399</a><br><a href="#">18245281</a><br><a href="#">27002127</a> |
| 1                                       | HP_0432                 | <a href="#">Q25182</a> | STYK        | No sensor domain                                                      | No data                       | <a href="#">10427715</a>                                                                                     |
| 1                                       | HP_0431                 | <a href="#">Q25181</a> | PP2C        | No sensor domain                                                      | No data                       | <a href="#">21360674</a>                                                                                     |

|                                                |                         |                                                  |    |                                                          |                                    |                                                                                                              |
|------------------------------------------------|-------------------------|--------------------------------------------------|----|----------------------------------------------------------|------------------------------------|--------------------------------------------------------------------------------------------------------------|
| <b><i>Mycobacterium tuberculosis</i> H37Rv</b> |                         |                                                  |    |                                                          |                                    |                                                                                                              |
| 1                                              | Rv0490 ( <i>senX3</i> ) | <a href="#">P9WVK5</a>                           | HK | Low phosphate; unknown sensor domain                     | Virulence                          | <a href="#">25344463</a>                                                                                     |
| 2                                              | Rv0601c+<br>Rv0600c     | <a href="#">O07777</a><br><a href="#">O07778</a> | HK | Unknown sensor domain                                    | No data                            | <a href="#">17434492</a>                                                                                     |
| 3                                              | Rv0758 ( <i>phoR</i> )  | <a href="#">P71815</a>                           | HK | Unknown sensor domain                                    | Virulence?                         | <a href="#">28782049</a><br><a href="#">18757548</a>                                                         |
| 4                                              | Rv0845 ( <i>narS</i> )  | <a href="#">O53857</a>                           | HK | Nitrite? Unknown sensor domain                           | Nitrate metabolism                 | <a href="#">12595424</a><br><a href="#">25659431</a>                                                         |
| 5                                              | Rv0902c ( <i>prnB</i> ) | <a href="#">P9WVK7</a>                           | HK | Unknown sensor domain                                    | Early intracellular multiplication | <a href="#">11953357</a>                                                                                     |
| 6                                              | Rv0982 ( <i>mprB</i> )  | <a href="#">P9WGL1</a>                           | HK | Unknown sensor domain, possible autoinhibition           | Persistent infection               | <a href="#">11675502</a><br><a href="#">17379732</a><br><a href="#">24187094</a>                             |
| 7                                              | Rv1028c ( <i>kdpD</i> ) | <a href="#">P9WGL3</a>                           | HK | Turgor? Unknown sensor domain                            | Potassium transport                | <a href="#">12595424</a><br><a href="#">12581360</a><br><a href="#">24667597</a>                             |
| 8                                              | Rv1032c ( <i>trcS</i> ) | <a href="#">P96368</a>                           | HK | Unknown sensor domain                                    | Multiple genes                     | <a href="#">12595424</a><br><a href="#">12499293</a>                                                         |
| 9                                              | Rv2027c ( <i>dosT</i> ) | <a href="#">P9WVK1</a>                           | HK | O <sub>2</sub> , CO; two heme-binding GAF sensor domains | Persistence, latency               | <a href="#">28977726</a><br><a href="#">15033981</a><br><a href="#">19276084</a><br><a href="#">18980385</a> |

|    |                                       |                        |       |                                                          |                                                                                |                                                                                                              |
|----|---------------------------------------|------------------------|-------|----------------------------------------------------------|--------------------------------------------------------------------------------|--------------------------------------------------------------------------------------------------------------|
| 10 | Rv3132c ( <i>devS</i> , <i>dosS</i> ) | <a href="#">P9WVK3</a> | HK    | O <sub>2</sub> , CO; two heme-binding GAF sensor domains | Latency, nitrate metabolism                                                    | <a href="#">15033981</a><br><a href="#">25659431</a><br><a href="#">28977726</a>                             |
| 11 | Rv3220c ( <i>pdtaS</i> )              | <a href="#">P9WGL5</a> | HK    | H-kinase_N and PAS sensor domains                        | Respiration?                                                                   | <a href="#">12595424</a><br><a href="#">16026786</a><br><a href="#">22115998</a>                             |
| 12 | Rv3245c ( <i>mtrB</i> )               | <a href="#">P9WVK9</a> | HK    | Unknown sensor domain                                    | Cell division                                                                  | <a href="#">22610443</a>                                                                                     |
| 13 | Rv3365c                               | <a href="#">Q93IG6</a> | HK    | No phosphorylatable His; unknown sensor domain           | Inhibition of macrophage apoptosis                                             | <a href="#">22275911</a>                                                                                     |
| 14 | Rv3764c ( <i>trcY</i> )               | <a href="#">O69729</a> | HK    | Iron limitation? Unknown sensor domain                   | No data                                                                        | <a href="#">12595424</a><br><a href="#">22001925</a>                                                         |
| 1  | Rv0386                                | <a href="#">O53720</a> | ACIII | Contains ATPase, TPR and a DNA-binding domain            | Virulence                                                                      | <a href="#">15955067</a><br><a href="#">19516256</a>                                                         |
| 2  | Rv0891c                               | <a href="#">P9WMV1</a> | ACIII | No sensor domain                                         | Expressed in hypoxia                                                           | <a href="#">26025969</a>                                                                                     |
| 3  | Rv1120c                               | <a href="#">O06572</a> | ACIII | Pseudogene? No sensor domain                             | No data                                                                        | <a href="#">15908099</a>                                                                                     |
| 4  | Rv1264                                | <a href="#">P9WMU9</a> | ACIII | pH, contains N-terminal PF16701 regulatory domain        | May be active in early phagosomes, regulates slow growth via small RNA MTS0997 | <a href="#">11839758</a><br><a href="#">15890882</a><br><a href="#">17005450</a><br><a href="#">26573524</a> |
| 5  | Rv1318c                               | <a href="#">P9WQ33</a> | ACIII | Unknown integral membrane sensor domain                  | No data                                                                        | <a href="#">15182360</a>                                                                                     |
| 6  | Rv1319c                               | <a href="#">P9WQ31</a> | ACIII | Unknown integral membrane sensor domain                  | No data                                                                        | <a href="#">15182360</a>                                                                                     |
| 7  | Rv1320c                               | <a href="#">P9WQ29</a> | ACIII | Unknown integral membrane sensor domain                  | No data                                                                        | <a href="#">15182360</a>                                                                                     |
| 8  | Rv1358                                | <a href="#">Q11028</a> | ACIII | Contains ATPase, TPR and a DNA-binding domain            | No clear data                                                                  | <a href="#">28650996</a><br><a href="#">22307756</a>                                                         |
| 9  | Rv1359                                | <a href="#">P9WM05</a> | ACIII | No sensor domain                                         | No data                                                                        |                                                                                                              |
| 10 | Rv1625c                               | <a href="#">P9WQ35</a> | ACIII | Unknown integral membrane sensor domain                  | Appears to be the most active of <i>Mtub</i> adenylate cyclases                | <a href="#">11447108</a><br><a href="#">15500449</a>                                                         |
| 11 | Rv1647                                | <a href="#">P94982</a> | ACIII | Unknown sensor domain                                    | Works during log phase                                                         | <a href="#">15500449</a>                                                                                     |
| 12 | Rv1900c                               | <a href="#">O07732</a> | ACIII | Contains an N-terminal $\alpha/\beta$ hydrolase domain   | No data                                                                        | <a href="#">15678099</a>                                                                                     |
| 13 | Rv2212                                | <a href="#">P9WMU7</a> | ACIII | Unknown, contains PF16701 regulatory domain              | Intracellular survival, virulence, recovery from dormancy                      | <a href="#">27481930</a><br><a href="#">28861399</a>                                                         |
| 14 | Rv2435c                               | <a href="#">P71914</a> | ACIII | dCache sensor domain                                     | No data                                                                        | <a href="#">27049771</a>                                                                                     |
| 15 | Rv2488c                               | <a href="#">O53213</a> | ACIII | Contains ATPase, TPR and a DNA-binding domain            | Transcriptional regulator, control of DNA damage?                              | <a href="#">26270051</a>                                                                                     |
| 16 | Rv3645                                | <a href="#">I6X7Z3</a> | ACIII | Unknown integral membrane sensor domain                  | No data                                                                        | <a href="#">15182360</a><br><a href="#">22094466</a>                                                         |
| 1  | Rv0805 ( <i>cpdA</i> )                | <a href="#">P9WP65</a> | CPD   | No sensor domain                                         | Virulence?                                                                     | <a href="#">16313172</a><br><a href="#">17059828</a>                                                         |
| 1  | Rv1354c                               | <a href="#">P9WM13</a> | DGC   | GAF sensor domain; also contains EAL domain              | Cell length, colony morphology, long-term survival                             | <a href="#">21151497</a><br><a href="#">22343354</a><br><a href="#">25037163</a>                             |
| 1  | Rv1357c                               | <a href="#">P9WM07</a> | PDE   | No sensor domain                                         |                                                                                |                                                                                                              |
| 1  | Rv3586                                | <a href="#">P9WNW5</a> | DAC   | No sensor domain                                         |                                                                                |                                                                                                              |
| 1  | Rv2837c                               | <a href="#">P71615</a> | CDA   | No sensor domain                                         | Virulence, expression of CRISPR-Cas                                            | <a href="#">22529992</a><br><a href="#">24806618</a><br><a href="#">26668313</a><br><a href="#">29378893</a> |
| 1  | Rv2069 ( <i>sigC</i> )                | <a href="#">P9WGH1</a> | ECF   | No sensor domain                                         | <i>hspX</i> , <i>mtrA</i> , <i>senX</i> ; important for pathogenicity          | <a href="#">15049808</a>                                                                                     |

|    |                         |                        |      |                                                       |                                                                                     |                                                                                  |
|----|-------------------------|------------------------|------|-------------------------------------------------------|-------------------------------------------------------------------------------------|----------------------------------------------------------------------------------|
| 2  | Rv3414c ( <i>sigD</i> ) | <a href="#">P9WGG9</a> | ECF  | No sensor domain                                      | <i>rfpC, recR, pks10</i> ; stationary phase genes; essential for virulence          | <a href="#">15659067</a><br><a href="#">15375142</a>                             |
| 3  | Rv1221 ( <i>sigE</i> )  | <a href="#">P9WGG7</a> | ECF  | Unknown sensor domain                                 | <i>clgR, aceA, gltA, fadB, fadE, pspA</i> ; heat shock, detergent, oxidative stress | <a href="#">11489128</a><br><a href="#">18657035</a>                             |
| 4  | Rv0182c ( <i>sigG</i> ) | <a href="#">P9WGG5</a> | ECF  | Contains C-terminal SnoaL_2 domain                    | <i>aceA, clpB, dnaK, fadE, lexA</i> ; survival in macrophages                       | <a href="#">21169493</a><br><a href="#">28934483</a>                             |
| 5  | Rv3223c ( <i>sigH</i> ) | <a href="#">P9WGH9</a> | ECF  | No sensor domain                                      | Heat shock, detergent, oxidative stress                                             | <a href="#">11567012</a><br><a href="#">12123450</a>                             |
| 6  | Rv1189 ( <i>sigI</i> )  | <a href="#">P9WGH3</a> | ECF  | Contains C-terminal SnoaL_2 domain                    | No data                                                                             | <a href="#">18248429</a><br><a href="#">28934483</a>                             |
| 7  | Rv3328c ( <i>sigJ</i> ) | <a href="#">L0TCG5</a> | ECF  | Contains C-terminal SnoaL_2 domain                    | Oxidative stress?                                                                   | <a href="#">28934483</a>                                                         |
| 8  | Rv0445c ( <i>sigK</i> ) | <a href="#">P9WGH7</a> | ECF  | No sensor domain                                      | <i>dipZ, mpt70, mpt83, rskA</i>                                                     | <a href="#">15882422</a>                                                         |
| 9  | Rv0735 ( <i>sigL</i> )  | <a href="#">P9WGH5</a> | ECF  | No sensor domain                                      | <i>mpt53, pks7, pks10</i> ; secreted proteins, polyketide synthase                  | <a href="#">16199577</a><br><a href="#">16552079</a>                             |
| 10 | Rv3911 ( <i>sigM</i> )  | <a href="#">O53590</a> | ECF  | No sensor domain                                      | <i>esxT, esxU, esxE, esxF</i> ; surface proteins, lipids, mycolic acids             | <a href="#">17028284</a>                                                         |
| 1  | Rv0014c ( <i>pknB</i> ) | <a href="#">P9WI81</a> | STYK | Contains 4 C-terminal PASTA domains                   | Cell division, survival in the host                                                 | <a href="#">16980473</a><br><a href="#">24706757</a>                             |
| 2  | Rv0015c ( <i>pknA</i> ) | <a href="#">P9WI83</a> | STYK | Unknown sensor domain                                 | Cell division, survival in the host                                                 | <a href="#">15985609</a><br><a href="#">25713147</a>                             |
| 3  | Rv0410c ( <i>pknG</i> ) | <a href="#">P9WI73</a> | STYK | Contains rubredoxin and TPR-like domains              | Growth in the host, Glu/Gln levels                                                  | <a href="#">15186418</a><br><a href="#">19638631</a>                             |
| 4  | Rv0647c ( <i>ubiB</i> ) | <a href="#">P9WQI1</a> | STYK | Unknown sensor domain                                 | Ubiquinone biosynthesis                                                             |                                                                                  |
| 5  | Rv0931c ( <i>pknD</i> ) | <a href="#">P9WI79</a> | STYK | Contains C-terminal $\beta$ -propeller domain (6xNHL) | Invasion of host brain endothelia                                                   | <a href="#">17411339</a><br><a href="#">22243650</a>                             |
| 6  | Rv1266c ( <i>pknH</i> ) | <a href="#">P9WI71</a> | STYK | Contains C-terminal PF14032 domain                    | Transcriptional regulator EmbR, HK DevR                                             | <a href="#">17286964</a><br><a href="#">16585755</a>                             |
| 7  | Rv1743 ( <i>pknE</i> )  | <a href="#">P9WI77</a> | STYK | Contains thioredoxin-like PF13462 domain              | NO stress, macrophage apoptosis                                                     | <a href="#">17892498</a>                                                         |
| 8  | Rv1746 ( <i>pknF</i> )  | <a href="#">P9WI75</a> | STYK | Unknown sensor domain                                 | GroEL; glucose transport, cell division                                             | <a href="#">15135525</a><br><a href="#">15866927</a><br><a href="#">19201798</a> |
| 9  | Rv2088 ( <i>pknJ</i> )  | <a href="#">P9WI67</a> | STYK | Contains C-terminal PF14032 domain                    | EmbR, PykA, Mdh; mycolic acid biosynthesis                                          | <a href="#">20185505</a><br><a href="#">20520732</a>                             |
| 10 | Rv2176 ( <i>pknL</i> )  | <a href="#">P9WI63</a> | STYK | Unknown sensor domain                                 | DNA-binding protein Rv2175c                                                         | <a href="#">19457863</a>                                                         |
| 11 | Rv2232 ( <i>ptkA</i> )  | <a href="#">P9WPI9</a> | STYK | Tyr-specific, disordered N-terminal domain            | Virulence?                                                                          | <a href="#">19366344</a><br><a href="#">29884774</a>                             |
| 12 | Rv2914c ( <i>pknI</i> ) | <a href="#">P9WI69</a> | STYK | Unknown sensor domain                                 | Oxidative stress?                                                                   | <a href="#">27818650</a>                                                         |
| 13 | Rv3080c ( <i>pknK</i> ) | <a href="#">P9WI65</a> | STYK | Contains ATPase and TPR-like domains                  | VirS; persistent infection                                                          | <a href="#">19251699</a><br><a href="#">20522497</a>                             |
| 14 | Rv3197 ( <i>abc1</i> )  | <a href="#">O53343</a> | STYK | Belongs to the ABC1 family                            | Assists in host survival                                                            | <a href="#">20394526</a>                                                         |
| 1  | Rv0018c ( <i>pstP</i> ) | <a href="#">P9WHW5</a> | PP2C | Unknown sensor domain                                 | Dephosphorylation of mycobacterial STY kinases                                      | <a href="#">14575702</a><br><a href="#">27758870</a>                             |
| 2  | Rv1364c                 | <a href="#">P9WLZ7</a> | PP2C | PAS, HSP90 ATPase, and STAS anti-sigma domain         |                                                                                     | <a href="#">19700407</a><br><a href="#">20541534</a>                             |
| 3  | Rv0153c ( <i>ptpB</i> ) | <a href="#">I6WXK4</a> | LMWP | pTyr-specific, no sensor domain                       | Virulence, survival in the host                                                     | <a href="#">10986245</a><br><a href="#">14617138</a><br><a href="#">29888212</a> |
| 4  | Rv2234 ( <i>ptpA</i> )  | <a href="#">P9WIA1</a> | LMWP | pTyr-specific, no sensor domain                       | Virulence, survival in the host                                                     | <a href="#">10986245</a><br><a href="#">18474358</a><br><a href="#">25743628</a> |

| No                                       | Locus tag (gene)        | UniProt entry          | Sensor type | Sensed ligand, sensor domain | Regulated genes, processes  | PubMed reference                                     |
|------------------------------------------|-------------------------|------------------------|-------------|------------------------------|-----------------------------|------------------------------------------------------|
| <b><i>Mycoplasma pneumoniae</i> M129</b> |                         |                        |             |                              |                             |                                                      |
| 1                                        | MPN_078 ( <i>fruA</i> ) | <a href="#">P75039</a> | EIIC        | Fructose                     | Sugar utilization           | <a href="#">15547265</a>                             |
| 2                                        | MPN_207 ( <i>ptsG</i> ) | <a href="#">P75569</a> | EIIC        | Glucose                      | Sugar utilization           | <a href="#">15547265</a>                             |
| 3                                        | MPN_496 ( <i>ulaA</i> ) | <a href="#">P75291</a> | EIIC        | Ascorbate?                   | Sugar utilization           |                                                      |
| 4                                        | MPN_651 ( <i>mtlA</i> ) | <a href="#">P75146</a> | EIIC        | Mannitol                     | Sugar utilization           | <a href="#">15547265</a>                             |
| 1                                        | MPN_244 ( <i>cdaM</i> ) | <a href="#">P75528</a> | DAC         | No sensor domain             | Potassium homeostasis       | <a href="#">28751888</a>                             |
| 1                                        | MPN_140 ( <i>nrnA</i> ) | <a href="#">P75144</a> | CDA         | No sensor domain             | Not active against c-di-AMP | <a href="#">28751888</a>                             |
| 2                                        | MPN_549 ( <i>pdeM</i> ) | <a href="#">P75229</a> | CDA         | No sensor domain             | Potassium homeostasis       | <a href="#">28751888</a>                             |
| 1                                        | MPN_626 ( <i>sigD</i> ) | <a href="#">P75169</a> | ECF         | No sensor domain             | No data                     | <a href="#">25925568</a>                             |
| 1                                        | MPN_248 ( <i>prkC</i> ) | <a href="#">P75524</a> | STYK        | No sensor domain             | Gliding motility            | <a href="#">19858294</a><br><a href="#">23396910</a> |
| 1                                        | MPN_247 ( <i>prpC</i> ) | <a href="#">P75525</a> | PP2C        | No sensor domain             | Gliding motility            | <a href="#">16857667</a><br><a href="#">23396910</a> |

|                                             |                               |                        |      |                                                  |                                                                     |                                                                                  |
|---------------------------------------------|-------------------------------|------------------------|------|--------------------------------------------------|---------------------------------------------------------------------|----------------------------------------------------------------------------------|
| <b><i>Neisseria gonorrhoeae</i> FA 1090</b> |                               |                        |      |                                                  |                                                                     |                                                                                  |
| 1                                           | NGO_0112                      | <a href="#">Q5FAB5</a> | HK   | Unknown sensor domain                            | No data                                                             |                                                                                  |
| 2                                           | NGO_0176 ( <i>misS</i> )      | <a href="#">Q5FA56</a> | HK   | Unknown sensor domain                            | Virulence, resistance to aminoglycosides and antimicrobial peptides | <a href="#">27216061</a><br><a href="#">27353397</a><br><a href="#">28652307</a> |
| 3                                           | NGO_0753 ( <i>narQ/narX</i> ) | <a href="#">Q5F8L9</a> | HK   | PilJ-type sensor domain, nitrite is not a signal | Oxygen-limited growth                                               | <a href="#">10972806</a><br><a href="#">16954205</a>                             |
| 4                                           | NGO_1867 ( <i>hydH</i> )      | <a href="#">Q5F5Q0</a> | HK   | Unknown sensor domain                            | No data                                                             | <a href="#">16194237</a>                                                         |
| 1                                           | NGO_1944 ( <i>rpoE</i> )      | <a href="#">Q5F5I1</a> | ECF  | No sensor domain                                 | Methionine sulfoxide reductase                                      | <a href="#">16672599</a>                                                         |
| 1                                           | NGO_1424 ( <i>ubiB</i> )      | <a href="#">Q5F6W9</a> | STYK | No sensor domain                                 | Ubiquinone biosynthesis                                             |                                                                                  |
| 1                                           | NGO_0541                      | <a href="#">Q5F962</a> | LMWP | No sensor domain                                 | No data                                                             |                                                                                  |

| No                                         | Locus tag (gene)        | UniProt entry          | Sensor type | Sensed ligand, sensor domain                                                                    | Regulated genes, processes                                                                                          | PubMed reference                                                                 |
|--------------------------------------------|-------------------------|------------------------|-------------|-------------------------------------------------------------------------------------------------|---------------------------------------------------------------------------------------------------------------------|----------------------------------------------------------------------------------|
| <b><i>Porphyromonas gingivalis</i> W83</b> |                         |                        |             |                                                                                                 |                                                                                                                     |                                                                                  |
| 1                                          | PG_0017                 | <a href="#">Q7MXX9</a> | HK          | Unknown, PAS-like sensor domain                                                                 | No data                                                                                                             |                                                                                  |
| 2                                          | PG_0052 ( <i>porY</i> ) | <a href="#">Q7MXV5</a> | HK          | Unknown sensor domain                                                                           | Type IX secretion system                                                                                            | <a href="#">27630829</a><br><a href="#">29209465</a>                             |
| 3                                          | PG_0719 ( <i>haeS</i> ) | <a href="#">Q7MWB2</a> | HK          | Unknown sensor domain                                                                           | Hemin transport                                                                                                     | <a href="#">24039921</a>                                                         |
| 4                                          | PG_0746                 | <a href="#">Q7MW90</a> | HK          | Unknown, PAS sensor domain                                                                      | No data                                                                                                             |                                                                                  |
| 5                                          | PG_1432 ( <i>fimS</i> ) | <a href="#">Q7MUR1</a> | HK          | Unknown, 4 TPR repeats in the sensor domain                                                     | Production of fimbriae                                                                                              | <a href="#">10832973</a><br><a href="#">20061484</a><br><a href="#">20118268</a> |
| 6                                          | PG_1797 ( <i>gppX</i> ) | <a href="#">Q7MTY1</a> | HK          | Unknown, contains TPR-like sensor domain and C-terminal REC and DNA-binding domains             | Gingipain secretion, pigmentation, biofilm formation                                                                | <a href="#">14638996</a><br><a href="#">23194602</a>                             |
| 1                                          | PG_1588                 | <a href="#">Q7MUE0</a> | DAC         | No sensor domain                                                                                | No data                                                                                                             |                                                                                  |
| 1                                          | PG_1091                 | <a href="#">Q7MVH2</a> | CDA         | No sensor domain                                                                                | No data                                                                                                             |                                                                                  |
| 2                                          | PG_1592                 | <a href="#">Q7MUD7</a> | CDA         | Unknown; contains 7TM-HDED extracellular sensor domain and 7TM-7TMR_HD integral membrane domain | No data                                                                                                             |                                                                                  |
| 1                                          | PG_0162                 | <a href="#">Q7MXL2</a> | ECF         | No sensor domain                                                                                | Gingipain, virulence, biofilm formation                                                                             | <a href="#">20807237</a><br><a href="#">26216199</a><br><a href="#">25596817</a> |
| 2                                          | PG_0214                 | <a href="#">Q7MXH4</a> | ECF         | No sensor domain                                                                                | No data                                                                                                             | <a href="#">20807237</a>                                                         |
| 3                                          | PG_0985                 | <a href="#">Q7MVR1</a> | ECF         | No sensor domain                                                                                | H <sub>2</sub> O <sub>2</sub> sensitivity                                                                           | <a href="#">20807237</a>                                                         |
| 4                                          | PG_1318                 | <a href="#">Q7MV00</a> | ECF         | No sensor domain                                                                                | Proteinase secretion, pigmentation                                                                                  | <a href="#">19702950</a>                                                         |
| 5                                          | PG_1660                 | <a href="#">Q7MU87</a> | ECF         | No sensor domain                                                                                | Gingipain, H <sub>2</sub> O <sub>2</sub> sensitivity                                                                | <a href="#">20807237</a>                                                         |
| 6                                          | PG_1827 ( <i>sigH</i> ) | <a href="#">Q7MTV5</a> | ECF         | No sensor domain                                                                                | <i>sod</i> , <i>trx</i> , <i>tpx</i> , <i>ftn</i> , <i>feoB2</i> , <i>hmu</i> ; oxidative stress, biofilm formation | <a href="#">20807237</a><br><a href="#">22520389</a><br><a href="#">25596817</a> |
| 1                                          | PG_0436                 | <a href="#">Q7MWZ2</a> | STYK        | Unknown                                                                                         | No data                                                                                                             |                                                                                  |
| 1                                          | PG_0435                 | <a href="#">Q7MWZ3</a> | PP2C        | Unknown                                                                                         | No data                                                                                                             |                                                                                  |
| 2                                          | PG_1641                 | <a href="#">Q7MU97</a> | LMWP        | No sensor domain                                                                                | No data                                                                                                             |                                                                                  |

|                                                |                        |                        |      |                                                                              |                         |  |
|------------------------------------------------|------------------------|------------------------|------|------------------------------------------------------------------------------|-------------------------|--|
| <b><i>Rickettsia typhi</i> str. Wilmington</b> |                        |                        |      |                                                                              |                         |  |
| 1                                              | RT0221                 | <a href="#">Q68XD9</a> | HK   | Unknown_sensor domain                                                        | No data                 |  |
| 2                                              | RT0412                 | <a href="#">Q68WV3</a> | HK   | Unknown_sensor domain                                                        | No data                 |  |
| 3                                              | RT0452                 | <a href="#">Q68WR4</a> | HK   | SSS family sensor domain, may be sensing Pro and/or Na <sup>+</sup> gradient | No data                 |  |
| 4                                              | RT0603                 | <a href="#">Q68WC5</a> | HK   | Unknown_sensor domain                                                        | No data                 |  |
| 1                                              | RT0229                 | <a href="#">Q68XD2</a> | DGC  | PleD-type response regulator, two REC domains                                | No data                 |  |
| 1                                              | RT0238                 | <a href="#">Q68XC3</a> | PDE  | Unknown_sensor domain                                                        | No data                 |  |
| 1                                              | RT0674 ( <i>ubiB</i> ) | <a href="#">Q68W58</a> | STYK | UbiB domain                                                                  | Ubiquinone biosynthesis |  |



| No                                          | Locus tag (gene)                       | UniProt entry          | Sensor type | Sensed ligand, sensor domain             | Regulated genes, processes                                          | PubMed reference                                     |
|---------------------------------------------|----------------------------------------|------------------------|-------------|------------------------------------------|---------------------------------------------------------------------|------------------------------------------------------|
| <b><i>Streptococcus pyogenes</i> M1 GAS</b> |                                        |                        |             |                                          |                                                                     |                                                      |
| 1                                           | SPy_0242                               | <a href="#">Q9A1J7</a> | HK          | Integral membrane sensor domain          | No data                                                             |                                                      |
| 2                                           | SPy_0244                               | <a href="#">Q9A1J6</a> | HK          | Integral membrane sensor domain          | No data                                                             |                                                      |
| 3                                           | SPy_0337 ( <i>covS</i> , <i>csrS</i> ) | <a href="#">Q87528</a> | HK          | Mg <sup>2+</sup> ? Unknown sensor domain | Synthesis of hyaluronic acid capsule, streptokinase, streptolysin S | <a href="#">15175307</a><br><a href="#">12646707</a> |
| 4                                           | SPy_0529                               | <a href="#">Q9A107</a> | HK          | PAS sensor domain                        | No data                                                             |                                                      |
| 5                                           | SPy_0875                               | <a href="#">Q9A099</a> | HK          | Unknown sensor domain                    | No data                                                             |                                                      |
| 6                                           | SPy_1061                               | <a href="#">Q99ZV0</a> | HK          | Unknown sensor domain                    | No data                                                             |                                                      |
| 7                                           | SPy_1082                               | <a href="#">Q99ZT6</a> | HK          | Unknown sensor domain                    | No data                                                             |                                                      |
| 8                                           | SPy_1236                               | <a href="#">Q99ZG9</a> | HK          | Unknown sensor domain                    | No data                                                             |                                                      |
| 9                                           | SPy_1588                               | <a href="#">Q99YQ6</a> | HK          | Unknown sensor domain                    | No data                                                             |                                                      |
| 10                                          | SPy_1605                               | <a href="#">Q99YP4</a> | HK          | Integral membrane sensor domain          | No data                                                             |                                                      |
| 11                                          | SPy_1622 ( <i>liaS</i> )               | <a href="#">Q99YN2</a> | HK          | Integral membrane sensor domain          | No data                                                             | <a href="#">19118347</a><br><a href="#">23704792</a> |
| 12                                          | SPy_2026                               | <a href="#">Q99XU6</a> | HK          | Unknown sensor domain                    | No data                                                             |                                                      |
| 1                                           | SPy_0146 ( <i>frwC</i> )               | <a href="#">Q9A1Q9</a> | EIIC        | Fructose?                                | No data                                                             | <a href="#">27862457</a>                             |
| 2                                           | SPy_0174 ( <i>ulaA</i> )               | <a href="#">Q9A1N9</a> | EIIC        | 3-keto-L-gulonate, ascorbate             | No data                                                             | <a href="#">27862457</a>                             |
| 3                                           | SPy_0572                               | <a href="#">Q9A0X4</a> | EIIC        | β-Glucosides                             | No data                                                             | <a href="#">27862457</a>                             |
| 4                                           | SPy_0630 ( <i>agaW</i> )               | <a href="#">Q9A0T5</a> | EIIC        | N-acetylgalactosamine?                   | No data                                                             | <a href="#">26787724</a>                             |
| 5                                           | SPy_0855 ( <i>fruA</i> )               | <a href="#">Q9A0B0</a> | EIIC        | Fructose                                 | <i>fruRBA</i> ; carbohydrate utilization                            | <a href="#">26787724</a>                             |
| 6                                           | SPy_1059                               | <a href="#">Q99ZV2</a> | EIIC        | Mannose? Sorbose?                        | No data                                                             | <a href="#">27862457</a>                             |
| 7                                           | SPy_1709                               | <a href="#">Q99YH0</a> | EIIC        | Galactose?                               | No data                                                             | <a href="#">26787724</a>                             |
| 8                                           | SPy_1739 ( <i>manM</i> )               | <a href="#">Q99YE5</a> | EIIC        | Mannose                                  | No data                                                             | <a href="#">27862457</a>                             |
| 9                                           | SPy_1815 ( <i>scrA</i> )               | <a href="#">Q99Y91</a> | EIIC        | Sucrose?                                 | No data                                                             | <a href="#">27862457</a>                             |
| 10                                          | SPy_1917 ( <i>lacE</i> )               | <a href="#">Q99Y17</a> | EIIC        | Lactose?                                 | No data                                                             | <a href="#">27862457</a>                             |
| 11                                          | SPy_1949                               | <a href="#">Q99XZ3</a> | EIIC        | Ascorbate?                               | No data                                                             | <a href="#">27862457</a>                             |
| 12                                          | SPy_1986                               | <a href="#">Q99XX0</a> | EIIC        | N-acetylglucosamine?                     | No data                                                             | <a href="#">27862457</a>                             |
| 13                                          | SPy_2050                               | <a href="#">Q99XT2</a> | EIIC        | Cellobiose?                              | No data                                                             | <a href="#">27862457</a>                             |
| 14                                          | SPy_2097                               | <a href="#">Q99XQ4</a> | EIIC        | Trehalose?                               | No data                                                             | <a href="#">27862457</a>                             |
| 1                                           | SPy_1036                               | <a href="#">Q99ZX0</a> | DAC         | No sensor domain                         | No data                                                             | <a href="#">21614937</a>                             |
| 1                                           | SPy_0720                               | <a href="#">Q9A0L5</a> | CDA         | No sensor domain                         | No data                                                             |                                                      |
| 2                                           | SPy_2184 ( <i>gdpP</i> )               | <a href="#">Q99XI9</a> | CDA         | No sensor domain                         | Secreted protease SpeB                                              | <a href="#">23869242</a>                             |
| 1                                           | SPy_1902                               | <a href="#">Q99Q57</a> | ECF?        | No sensor domain                         | No data                                                             |                                                      |
| 2                                           | SPy_2144                               | <a href="#">Q99XM1</a> | ECF?        | No sensor domain                         | No data                                                             |                                                      |
| 1                                           | SPy_1625 ( <i>stk</i> )                | <a href="#">Q99YN0</a> | STYK        | 3 PASTA domains, senses envelope stress  | Stress response, virulence, penicillin tolerance                    | <a href="#">21788381</a>                             |
| 1                                           | SPy_1626                               | <a href="#">Q99YM9</a> | PP2C        | No sensor domain                         | No data                                                             | <a href="#">28127804</a>                             |
| 2                                           | SPy_0039                               | <a href="#">Q9A1Y0</a> | LMWP        | No sensor domain                         | Virulence                                                           | <a href="#">25939957</a>                             |

| No                                                                   | Locus tag (gene)        | UniProt entry          | Sensor type | Sensed ligand, sensor domain                                                                    | Regulated genes, processes | PubMed reference        |
|----------------------------------------------------------------------|-------------------------|------------------------|-------------|-------------------------------------------------------------------------------------------------|----------------------------|-------------------------|
| <b><i>Treponema pallidum</i> subsp. <i>pallidum</i> str. Nichols</b> |                         |                        |             |                                                                                                 |                            |                         |
| 1                                                                    | TP_0363                 | <a href="#">P96123</a> | HK          | CheA, interacts with MCPs                                                                       | Chemotaxis                 |                         |
| 1                                                                    | TP_0040                 | <a href="#">Q56344</a> | MCP         | Unknown sensor domain                                                                           | No data                    |                         |
| 2                                                                    | TP_0488                 | <a href="#">O83501</a> | MCP         | Unknown, dCache_1 sensor domain                                                                 | No data                    |                         |
| 3                                                                    | TP_0639                 | <a href="#">O83646</a> | MCP         | Unknown integral membrane sensor domain                                                         | No data                    |                         |
| 4                                                                    | TP_0640                 | <a href="#">O52778</a> | MCP         | Unknown integral membrane sensor domain                                                         | No data                    |                         |
| 1                                                                    | TP0485                  | <a href="#">O83498</a> | ACIII       | Unknown sensor domain                                                                           | No data                    |                         |
| 1                                                                    | TP_0981                 | <a href="#">O83946</a> | DGC         | Unknown, GAF sensor domain                                                                      | No data                    |                         |
| 2                                                                    | *TP_0172                | <a href="#">O83202</a> | *DGC        | Unknown sensor domain, truncated GGDEF domain                                                   | No data                    |                         |
| 1                                                                    | TP_0764                 | <a href="#">O83745</a> | PDE         | Unknown sensor domain                                                                           | No data                    |                         |
| 2                                                                    | TP_0877                 | <a href="#">O83847</a> | PDE         | Unknown sensor domain                                                                           | No data                    |                         |
| 3                                                                    | TP_0912                 | <a href="#">O83882</a> | PDE         | DUF3391 sensor domain (uncharacterized)                                                         | No data                    |                         |
| 1                                                                    | TP_0826                 | <a href="#">O83798</a> | DAC         | No sensor domain                                                                                | No data                    |                         |
| 1                                                                    | TP_0436                 | <a href="#">O83450</a> | CDA         | No sensor domain                                                                                | No data                    |                         |
| 2                                                                    | TP_0803                 | <a href="#">O83781</a> | CDA         | No sensor domain                                                                                | No data                    |                         |
| 3                                                                    | TP_0651                 | <a href="#">O83657</a> | CDA         | Unknown; contains 7TM-HDED extracellular sensor domain and 7TM-7TMR_HD integral membrane domain | No data                    |                         |
| 1                                                                    | TP_0092 ( <i>rpoE</i> ) | <a href="#">O83130</a> | ECF         | No sensor domain                                                                                | No data                    |                         |
| 1                                                                    | TP_0591 ( <i>hprK</i> ) | <a href="#">O83600</a> | STYK        | No sensor domain                                                                                | Phosphorylates Hpr protein | <a href="#">9570401</a> |
| 1                                                                    | TP_0218                 | <a href="#">O83247</a> | PP2C        | Unknown sensor                                                                                  | No data                    |                         |
| 2                                                                    | TP_0219                 | <a href="#">O83248</a> | PP2C        | Integral membrane sensor domain                                                                 | No data                    |                         |
| 3                                                                    | TP_0854                 | <a href="#">O83826</a> | PP2C        | Unknown sensor domain, contains a sialidase-like fragment                                       | No data                    |                         |
